1 **HIV corruption of the Arp2/3-Cdc42-IQGAP1 axis to hijack cortical F-**  
2 **Actin to promote cell-cell viral spread.**

3  
4 Anupriya Aggarwal<sup>1</sup>, Alberto Ospina Stella<sup>1</sup>, Catherine Henry<sup>2,3,\*</sup>, Kedar Narayan<sup>2,3</sup> &  
5 Stuart G. Turville<sup>1</sup>  
6

7 <sup>1</sup>The Kirby Institute, University of New South Wales, New South Wales, Australia.

8 <sup>2</sup>Center for Molecular Microscopy, Center for Cancer Research, National Cancer Institute,  
9 National Institutes of Health, Bethesda, Maryland, USA.

10 <sup>3</sup>Cancer Research Technology Program, Frederick National Laboratory for Cancer Research,  
11 Frederick, Maryland, USA.

12 \* Current address: David H. Koch Institute for Integrative Cancer Research, Massachusetts  
13 Institute of Technology, Cambridge, MA, United States  
14  
15  
16

17 *Corresponding Author:*

18 Stuart G. Turville

19 The Kirby Institute, UNSW Australia

20 Office 529 Level 5 Wallace Wurth Building,

21 UNSW, Sydney NSW 2052

22 Telephone: +61 (02) 9385 0462

23 Email: [sturville@kirby.unsw.edu.au](mailto:sturville@kirby.unsw.edu.au)  
24

1 **Abstract**

2 F-Actin remodelling is important for the spread of HIV via cell-cell contacts, yet the  
3 mechanisms by which HIV corrupts the actin cytoskeleton are poorly understood. Through  
4 live cell imaging and focused ion beam scanning electron microscopy (FIB-SEM), we  
5 observed F-Actin structures that exhibit strong positive curvature to be enriched for HIV  
6 buds. Virion proteomics, gene silencing, and viral mutagenesis supported a Cdc42-IQGAP1-  
7 Arp2/3 pathway as the primary intersection of HIV budding, membrane curvature and F-  
8 Actin regulation. Whilst HIV egress activated the Cdc42-Arp2/3 filopodial pathway, this  
9 came at the expense of cell-free viral release. Importantly, release could be rescued by cell-  
10 cell contact, provided Cdc42 and IQGAP1 were present. From these observations we  
11 conclude that a proportion out-going HIV has corrupted a central F-Actin node that enables  
12 initial coupling of HIV buds to cortical F-Actin to place HIV at the leading cell edge. Whilst  
13 this initially prevents particle release, maturation of cell-cell contacts signals back to this F-  
14 Actin node to enable viral release & subsequent infection of the contacting cell.

15  
16  
17  
18  
19

## 1 **Introduction**

2

3 Actin is a major component of the cellular cytoskeleton and is present in both monomeric  
4 globular (G-actin) and polymeric filamentous (F-actin) forms in all eukaryotic cells.  
5 Specifically in human leukocytes, actin accounts for over 10% of the total protein content and  
6 is a prerequisite for many pathways involved in communication of the immune response,  
7 such as chemotaxis of leukocytes through to the formation of supramolecular structures like  
8 the immunological synapse- a fundamental structure driving the primary immune response.  
9 While cells encode a wide range of proteins that mediate F-actin remodelling, the critical  
10 ability to seed or 'nucleate' F-actin from the monomeric G-actin pool is limited to only a few  
11 protein families. The two major classes of cellular actin nucleators are the Arp2/3 complex  
12 and formins. The Arp2/3 complex is composed of 7 different subunits and allows formation  
13 of branched actin networks, through nucleation of a branch filament from an existing mother  
14 filament at an angle of 70 degrees [1]. In contrast, formins are large multidomain proteins that  
15 drive nucleation and/or elongation of unbranched linear actin filaments. The activity of  
16 cellular Arp2/3 and formins is tightly regulated by a complex network of signalling pathways  
17 that primarily rely on the molecular switch properties of Rho-GTPases, such as Rac1 and  
18 Cdc42, for their activation [2].

19

20 HIV infection and spread proceeds primarily in CD4 positive leukocytes of our immune  
21 system. Viral spread can be observed at two levels. Firstly, free virus release from infected  
22 cells, with virions travelling in a cell-free form until encountering a new target cell to infect.  
23 Secondly, HIV budding that occurs directly at sites of cell-cell contact. The supramolecular  
24 structure that enables the latter and highly efficient cell-cell viral transfer is referred to as the  
25 virological synapse (VS) [3,4]. In both cases, viral budding needs to proceed at the plasma  
26 membrane (PM) of infected cells and is initially driven by oligomerisation of the HIV  
27 structural protein Gag [5] and culminates with HIV particle abscission mediated by cellular  
28 proteins of the endosomal sorting complexes required for transport machinery (ESCRT) [6].  
29 Several F-actin structures have been previously observed in association with HIV assembly  
30 and higher-level Gag oligomerisation. These include; the temporal formation of F-Actin  
31 asters/stars that appear just underneath the PM prior to particle release [7], and assembling  
32 HIV particles decorating the tips of finger-like filopodial structures [8-10]. It is however  
33 unclear how these events are mechanistically connected and how coupling to the F-actin  
34 cytoskeleton benefits HIV release/spread. This can be considered at two-levels: firstly how  
35 does F-Actin regulation influence the assembly and release of cell free virus in infected cells?  
36 For instance, do cortical F-Actin structures facilitate HIV assembly and release at the PM as  
37 observed for other viruses [11]? Secondly, how is F-actin regulated at cell-cell contacts  
38 involving HIV infected cells? Several studies have shown that functional actin dynamics are  
39 required for cell-cell viral transfer [4], yet how HIV assembly and release are  
40 spatiotemporally coordinated during this process has not been clarified mechanistically.

41

42 With our primary aim to determine the role for F-Actin in cell-free HIV egress and cell-cell  
43 viral transfer, herein we peeled back the complexity of F-Actin regulation in leukocytes by  
44 successive depletion and/or knockout of key actin nucleators and other associated proteins  
45 that regulate their activity. In doing so, we biased the formation of different cortical F-Actin  
46 structures such as filopodia and lamellipodia. Herein we define these structures as outlined  
47 by Mattila and Lappalainen, i.e. Filopodia are cylindrical finger like protrusions approximately  
48 100–300 nm in diameter and up to 1µm to 10 µm or more in length, whereas lamellipodia  
49 are thin (100 nm to 200 nm thick) sheet/veil like cortical F-Actin protrusions [12]. Whilst the  
50 regulation of lamellipodia is well understood and primarily depends on branched F-actin

1 nucleation by the Arp2/3 complex downstream of Rac1 and its effector Wave2 [13,14],  
2 various models have been proposed for filopodia formation and increasing evidence suggests  
3 this process may be cell-type specific [15]. Importantly, little is known about the mechanism  
4 of filopodia formation in cells of hematopoietic lineage, despite the fact that filopodia play  
5 important roles in immune cell function.

6  
7 Using a combination of live cell imaging, focused ion beam scanning electron microscopy  
8 (FIB-SEM), virion mass spectrometry and viral infection assays, we observed the influence  
9 of HIV on cortical F-Actin at several levels. First, FIB-SEM revealed HIV budding to be  
10 relatively enriched in areas of high positive membrane curvature within Arp2/3-dependent  
11 cortical F-Actin structures, including filopodia and lamellipodia. Second, virion mass  
12 spectrometry identified a cortical F-Actin signalling node comprising of the Arp2/3 related  
13 GTPases Rac1 and Cdc42 and their binding partner, the scaffolding protein IQGAP1. Finally,  
14 while depletion of a number of dominant F-actin regulators was observed to affect free virus  
15 release, cell-cell viral transfer was only significantly impaired in cells depleted of Cdc42 or  
16 IQGAP1. Collectively these observations support a dominant role of the GTPase Cdc42 and  
17 IQGAP1 in the final stages of viral egress and cell-cell spread. In this setting we propose HIV  
18 manipulation of the Cdc42/IQGAP1 node to be important at two levels: firstly it enables HIV  
19 to be embedded and retained in Arp2/3-dependent leading edge structures that are important  
20 during pre-synaptic events. Secondly, as the VS is engaged and matures, the same regulators  
21 likely coordinate F-Actin dynamics to enable conditions that facilitate final viral particle  
22 release.

23

1

## 2 **Results**

3

### 4 **Moulding cortical F-Actin through formin and Arp2/3 depletion**

5

6 A physical association of HIV with F-actin structures has been previously observed in all  
7 major HIV primary target cell types [9,16]. In infected CD4+ T-cells and dendritic cells this  
8 manifests in the form of HIV-Filopodia, which are F-actin rich finger-like structures with  
9 HIV assembly observed at their tips [9]. Since these structures are more prominent on  
10 dendritic cells and similarly enriched in U937 cells [9,17,18], this latter myeloid cell line  
11 provides an ideal model to dissect the link between F-Actin and HIV assembly in the specific  
12 context of hematopoietic cell lineages. Given the proposed role of Arp2/3 and formins in  
13 filopodia formation in other cell types, we initially focused on these key actin regulators for  
14 depletion. However, while Arp2/3 is ubiquitously expressed in eukaryotic cells, there are at  
15 least 15 different formins in vertebrates [19]. Since Diaph1, Diaph2 and FMNL1 are the most  
16 abundantly expressed in leukocytes, we tailored our initial shRNA screening to depletion of  
17 these formins. Disruption of filopodial networks was assessed by measuring filopodial  
18 abundance (average number of filopodia per cell) and length (average filopodial length  
19 measured from the PM to the tip). To this end we used several imaging techniques at  
20 increasing levels of resolution, including; i) live cell imaging, ii) fixed cell fluorescence  
21 imaging followed by 3D deconvolution, and iii) the power of correlative FIB-SEM to finely  
22 resolve F-Actin structures closer to the PM. In brief, FIB-SEM represents a method where  
23 iterative cycles of finely tuned ion abrasion milling are followed by high-resolution scanning  
24 electron microscopy of heavy-metal stained, resin-embedded cell samples [20,21]. The end  
25 result is the recording of a stack of 2D back-scatter electron images, which are then processed  
26 and converted to a 3D image volume, typically at ~ 10 nm pixel sampling (Fig.1 B-E). This  
27 method provides a powerful imaging tool for cell biology and virology, as it gives users the  
28 ability to resolve nanoscale ultrastructural features in cellular samples that may appear in  
29 association with viral particles [22].

30

31 Initial experiments revealed filopodial lengths to be dependent solely on the formin Diaph2  
32 and not the other leukocyte-enriched formins (Fig. S1). Silencing of Diaph2 by shRNA  
33 achieved >95% depletion at the protein level (Fig. S3), and in these cells cortical F-Actin  
34 coalesced into a network of abundant and short (1 to 3µm) filopodia (Fig. 1E&H; Movie S1).  
35 Since we could confirm this phenotype in CRISPR/Cas9-generated and clonally expanded  
36 Diaph2 homozygous knockout cells, our observations suggest that filopodial length but not  
37 seeding is dependent on Diaph2. Subsequent shRNA codepletion of other expressed formins  
38 in addition to Diaph2 did also not disrupt this short filopodial network (Fig. S1). Therefore,  
39 to test if the shorter but more abundant filopodia were Arp2/3-dependent, we disrupted both  
40 Diaph2 and the Arp2/3 complex by shRNA. Co-depletion led to short filopodia converging  
41 into an extensive lamellipodial network (Fig. 1A,E&H; Movie S2). To conclude, we could  
42 readily control cortical F-Actin within this leukocyte landscape, and generate three unique  
43 cell types with a continuum of cortical F-actin structures; i) long filopodia, ii) abundant short  
44 filopodia, and iii) an extensive network of large lamellipodia. Furthermore, our observations  
45 indicate that seeding of filopodia in myeloid cells requires Arp2/3-mediated actin nucleation,  
46 whereas filopodial elongation is dependent on the formin Diaph2 (Fig. 1. F-H).

47

### 48 **The influence of shifting F-Actin structures on the location of HIV budding**

49

50 In the context of HIV infected cells, we used our high-resolution imaging approaches to  
probe for a possible link between HIV assembly and specific F-Actin structures and/or

1 pathways in leukocytes. Previously we have observed live cells with long filopodia to have  
2 significant numbers of HIV positive tips [9], and readily concluded that in untreated cells  
3 HIV assembly is enriched to this site. However, detection of HIV buds in cells with short  
4 filopodia (i.e. depleted of Diaph2) was constrained by the inability to resolve F-Actin  
5 structures proximal to the PM by fluorescence microscopy alone. Thus, we applied FIB-  
6 SEM imaging to HIV-infected Diaph2<sup>-ve</sup> cells (short filopodia) and observed HIV buds in  
7 routine association with the tip and sides of these structures (Fig. 2A,B,E&H). In cells with  
8 prominent lamellipodia (Diaph2<sup>-ve</sup> Arp2/3<sup>-ve</sup>), FIB-SEM imaging revealed abundance of HIV  
9 buds along the ridges of lamellipodia (Fig. 2F&K; Movie S2). Therefore one common feature  
10 of each F-Actin structure was the appearance of HIV preferentially in areas of positive  
11 membrane curvature. Given the large topological differences between filopodia and  
12 lamellipodia, we assessed viral-bud density by accounting for the surface area available for  
13 budding within each distinct F-Actin structure. This revealed HIV buds to be significantly  
14 enriched in areas of high positive membrane curvature (Table SI; Fig. 2 G-L): Lamellipodial  
15 ridges and filopodia were the most active areas of viral assembly, with a distinct preference  
16 for the latter (filopodia tips outscored lamellipodial ridges by 5-fold, when surface area was  
17 considered). This observation supports two potential mechanisms. First, HIV assembly is  
18 facilitated by areas of positive curvature or alternatively, HIV assembly recruits/influences  
19 cellular protein(s) at the PM that can lead to positive curvature.

20

#### 21 Filopodia dominated by the formin Diaph2 present positive curvature at the plasma 22 membrane but exclude assembling HIV particles

23 To assess whether strong positive membrane curvature alone was sufficient to position HIV  
24 buds at filopodial tips, we induced long filopodia using a constitutively active (C/A) mutant  
25 of Diaph2. Diaphanous-related formins exist in an autoinhibited conformation mediated by  
26 the interaction between their N-proximal inhibitory domain (DID) and C-terminal  
27 autoregulatory domain (DAD) [23]. Disruption of this autoinhibitory state can be achieved by  
28 formins binding to Rho-GTPases or, as in our case, by deletion of their C-terminal DAD  
29 domain [24]. Importantly, in both cases the central actin polymerization domain of the formin  
30 is rendered constitutively active.

31

32 If HIV assembly was directly promoted by positive membrane curvature, filopodia induced  
33 by Diaph2<sup>C/A</sup> would incorporate assembling viral particles. However, while Diaph2<sup>C/A</sup>  
34 expression readily induced the formation of long straight filopodia with Diaph2 accumulating  
35 at the filopodial tips (Fig. 3A & Movie S3), in HIV infected cells we also observed complete  
36 exclusion of HIV particles from the tips of these structures (Fig. 3A-C & Movie S3).  
37 Therefore, the strong membrane curvature in filopodial tips alone is not sufficient to recruit  
38 HIV assembly to this region. Since long filopodia in WT cells are routinely HIV positive,  
39 whereas straight C/A Diaph2 driven filopodia are not, it is unlikely that formins represent the  
40 link of HIV to the F-actin cytoskeleton. We then turned our attention to the Arp2/3 complex,  
41 given that previous observations propose this as the dominant F-actin nucleator at the cell  
42 cortex, with formin activity being restricted to filament elongation post F-actin nucleation  
43 [25]. To confirm if Arp2/3 was the dominant filopodial nucleator in WT versus Diaph2<sup>C/A</sup>  
44 cells, we immunostained filopodia for Arp2/3, and examined the footprint of this nucleator  
45 along the filopodial body and tip. In both cell types, the filopodial bases (3µm from the  
46 membrane) were all Arp2/3 positive (Fig. 3D & E). In contrast, the filopodial tips of  
47 Diaph2<sup>C/A</sup> cells were negative for Arp2/3 antigen (Fig. 3D), whereas Arp2/3 was frequently  
48 observed along the entire shaft and at the tip of wildtype filopodia (Fig. 3E). To quantify the  
49 extent of Arp2/3 tip exclusion, we measured the distance from the tip of filopodia to the first  
50 detectable Arp2/3 signal and observed a significantly greater distance of Arp2/3 from the



1 filopodial tip in Diaph2<sup>C/A</sup> cells relative to WT cells (6.2µm versus 1.4µm;  $p > 0.0001$ ;  $n =$   
2 50). In summary, by mapping the HIV budding sites at high resolution we could reach several  
3 conclusions. Firstly, HIV buds primarily enrich to cortical F-Actin structures with positive  
4 curvature. Secondly, positive curvature and/or Diaph2 activity alone are not responsible for  
5 the enrichment of HIV buds to these sites. Finally, Arp2/3-dependent cortical F-actin  
6 structures are primarily HIV positive.

#### 7 HIV Gag can influence Arp2/3 dependent F-Actin pathways

8 Since HIV assembly at the PM is primarily driven by HIV-Gag, we turned to strategic Gag  
9 mutagenesis in an attempt to resolve the link of HIV assembly with cortical F-Actin  
10 structures. The HIV Gag mutant panel covered several well characterised mutants that could  
11 maintain HIV particle assembly and also binding to membrane Phosphatidylinositol (4,5)-  
12 bisphosphate (PIP2). Deletion of HIV Gag p6 and mutagenesis of the PTAP motif in p6, was  
13 used to block the recruitment of TSG101 and related ESCRT proteins involved in viral  
14 particle abscission (Fig. 4A-B). We also deleted the Nucleocapsid (NC) domain, as this has  
15 been previously proposed to mediate the interaction between HIV-Gag and F-actin [26].  
16 However, since NC is required to facilitate higher order oligomerisation of Gag [27], we  
17 replaced NC with the Leucine Zipper (LZ) domain from the *Saccharomyces*  
18 *cerevisiae* GCN4 protein (Fig. 4C), as this rescues Gag oligomerisation and ensures particle  
19 assembly proceeds in the absence of NC [28]. Finally, given the enrichment of HIV buds on  
20 F-Actin structures with positive curvature, we further generated two HIV Gag Capsid  
21 mutants P<sub>99</sub>A and EE<sub>75,76</sub>AA (Fig. 4D & E), both of which inhibit Gag curvature at the PM  
22 but not high order Gag oligomerisation [29,30]. As Diaph2 cannot recruit HIV to F-Actin and  
23 depletion of Diaph2 actually enriched HIV-positive filopodia (Fig. S1), we utilised Diaph2<sup>-ve</sup>  
24 cells and simply scored the number of filopodia per cell that were HIV positive for each viral  
25 Gag mutant. Using this approach, we observed no significant difference in viral filopodia  
26 when deleting p6, the PTAP motif in p6 or NC (Fig. 4F). However when using the P<sub>99</sub>A and  
27 EE<sub>75,76</sub>AA HIV capsid mutants (HIV curvature mutants), we observed Diaph2-depleted cells  
28 to not only lack any evident HIV buds at the PM but also their characteristic short filopodia.  
29 Instead, these cells resembled the lamellipodial phenotype observed in Diaph2<sup>-ve</sup>Arp2/3<sup>-ve</sup> co-  
30 depleted cells (Fig. 4G-I). This is consistent with HIV Gag curvature mutants acting as  
31 dominant negatives for the Arp2/3-dependent short filopodial pathway. To further test that  
32 HIV curvature mutants were specifically interrupting Arp2/3 F-actin pathways and not  
33 broadly influencing all pathways that may lead to filopodial formation (eg. Formin-induced  
34 filopodia), we infected Diaph2<sup>C/A</sup> cells with these mutants. In this setting we observed an  
35 ability of Diaph2<sup>C/A</sup> to rescue filopodia formation (Fig. 4F; Movie S4). Thus filopodial pools  
36 nucleated by Arp2/3 are most affected by HIV curvature mutants and this further supports the  
37 hypothesis that HIV assembly primarily influences elements of Arp2/3 F-Actin nucleation  
38 pathway.

39

#### 40 The HIV proteome reveals a GTPase node associated with Arp2/3 F-Actin regulation

41 HIV has been previously observed to incorporate F-Actin, various actin nucleators and  
42 numerous upstream/downstream regulators within virions [31-33]. Thus, we turned to mass  
43 spectrometry analysis of purified virions to observe the footprint of cytoskeletal proteins that  
44 are present at HIV assembly sites. For this analysis we also leveraged the three distinct F-  
45 Actin cell types generated above (i.e. long-filopodia, extensive short filopodia and large  
46 lamellipodia) as across each cell type they shared the feature of HIV buds being enriched in  
47 positively curved F-Actin structures. Using this approach we identified several Arp2/3  
48 complex subunits, alongside two major Arp2/3 regulators, the Rho-GTPases Rac1 and  
49 Cdc42, as well as their interaction partner IQGAP1. These regulators were observed across

50

1 all viral proteomes, irrespective of producer cell type (Fig.5 A&B). In addition to this F-Actin  
2 signalling node, HIV virions also acquired members of the integrin and cadherin families  
3 (Fig. 5 A-B; see nodes 3 and 4, respectively). These proteins, which are involved in cell-cell  
4 adhesion, are connected to the cortical F-actin cytoskeleton both physically and via signalling  
5 pathways [34]. Of interest was a depletion of the cadherin node in (Fig. 5 A; node 4), as well  
6 as an increase in Arp2/3 and Cdc42 content (Fig. 5 A; node 1) in virions produced by  
7 Diaph2-deficient cells. The latter observation is not only consistent with HIV assembly  
8 preferentially proceeding alongside short Arp2/3-dependent filopodia (as observed by FIB-  
9 SEM), but also suggests that these structures are dependent on Cdc42, which is a well known  
10 filopodial regulator [2]. Of note, the observed decrease of Arp2/3 components in virions  
11 produced in Diaph2 and Arp2/3 co-depleted cells (Fig. 5B, node 1) is both expected and  
12 consistent with depletion of these proteins at the cellular level (Fig. S3).

13

14 HIV exploits the Cdc42-Arp2/3 filopodial pathway to position virus at the leading edge of  
15 cell-cell contacts.

16 Since Cdc42 is an important regulator of Arp2/3, a master regulator of filopodia, and it was  
17 incorporated at higher levels in virions from our Diaph2<sup>-ve</sup> cells (more abundant short  
18 filopodia), we next targeted this protein for depletion. As a functional control, we targeted the  
19 homologous Rho-GTPase Rac1, best known for its role in lamellipodial regulation. We also  
20 investigated the scaffolding protein IQGAP1, which; i) is a binding partner and effector of  
21 both Cdc42 and Rac1 [35], and ii) plays an increasingly recognized role in actin cytoskeleton  
22 regulation [36], and iii) was consistently incorporated in virions in our experiments (Fig.5).  
23 While we succeeded in generating a viable Cdc42 homozygous knockout cell line using  
24 CRISPR/Cas9 (Fig. S4). Attempts at knocking out Rac1 led to multinucleated cell  
25 populations with reduced viability, which is consistent with previous reports of Rac1 being  
26 an essential gene [37]. To circumvent this, we partially depleted Rac1 by shRNA, and also  
27 generated a Wave2<sup>k/o</sup> cell line (Fig. S4), since Wave2 is the main downstream effector of  
28 Rac1 in F-actin regulation [38]. While obtaining homozygous IQGAP1 knockout clones via  
29 CRISPR-Cas9 proved challenging, we were able to establish a line stringently depleted of  
30 IQGAP1 using shRNA (>99% depletion at the protein level, Fig. S3).

31

32 Initial Rac1 depletion via shRNA, revealed a greater frequency of filopodia in infected cells  
33 and secondly the generation of significantly longer and thicker filopodia when cells were  
34 infected (Fig. 6B vs A). Similarly, WAVE2<sup>k/o</sup> cells infected with HIV had greater propensity  
35 to form filopodia (two-fold), and these were significantly longer and thicker compared to WT  
36 cells (Fig. 6C vs A and Fig. S2), but also uninfected WAVE2<sup>k/o</sup> cells (Fig. S2). Together  
37 these observations suggest that HIV infection stimulates a pathway of filopodial formation  
38 that is unchecked in Rac1<sup>-ve</sup> and WAVE2<sup>k/o</sup> cells, where the lamellipodial F-actin arm is  
39 disabled. Given the known role of Cdc42 in filopodia formation and its competing nature  
40 with the Rac1 pathway, we turned our attention to this Rho-GTPase. Importantly, Cdc42<sup>k/o</sup>  
41 cells were devoid of filopodia and coalesced cortical F-Actin into prominent lamellipodia,  
42 with no evident influence on F-actin when cells were HIV infected (Fig. 6D). Since IQGAP1  
43 has been previously reported to articulate Cdc42 signaling to the cytoskeleton [36], we also  
44 assessed the role of this regulator in the filopodial context. IQGAP1-deficient cells  
45 displayed a collapse in filopodial lengths (Fig. 6E), with maintenance of HIV at the leading  
46 edge of remaining filopodia, similar to that observed in Diaph2-depleted cells. We therefore  
47 conclude that IQGAP1 can influence filopodial networks but, like Diaph2, is not required for  
48 the seeding of filopodia. To summarize our combined observations from mass spectrometry,  
49 gene silencing and high-resolution imaging, reveal that HIV infection augments a pathway of  
50 filopodia formation, and this is most evident when the lamellipodial regulators are



1 inactivated. In contrast, removing Cdc42 completely blocked filopodia formation in a manner  
2 similar to Arp2/3 and Diaph2 co-depletion, whereas depletion of IQGAP1 or Diaph2 led to  
3 shorter filopodia. Together, our data indicates that HIV-assembly hijacks a cellular pathway  
4 that is dependent on Cdc42-Arp2/3 F-actin nucleation for filopodial seeding and  
5 IQGAP1/Diaph2 for filopodial elongation, in order to position itself at the tips of long  
6 filopodia.

#### 7 HIV cell-cell transfer is dependent on an intact Cdc42-IQGAP1-Arp2/3 pathway

8 Given the continuum of phenotypes observed in our abovementioned observations, we tested  
9 their impact on the late stages of the viral life cycle in the context of viral spread. For free  
10 virus release, we enumerated HIV particles accumulating in the supernatant as a measure of  
11 budding. As HIV spread can also proceed through direct cell-cell contacts, we further tested  
12 the ability of HIV to spread cell to cell by coincubating infected donor cells with permissive  
13 target cells. Using these approaches, we could determine if the generic lack of a cortical F-  
14 Actin structure or a specific F-Actin pathway is essential for HIV budding and/or cell-cell  
15 transfer.  
16

17  
18 Disruption of either the Rac1-WAVE2 pathway (lamellipodia) or Cdc42-IQGAP1 pathway  
19 (filopodia) both impaired free HIV budding, as indicated by significantly lower viral particle  
20 counts in the supernatant from cells depleted of these regulators, compared to untreated cells  
21 (Fig. 7 B). Furthermore, lack of budding was not associated with decreased viability of each  
22 cellular clone or lack of HIV Gag expression (Fig. S3 H & I respectively). However,  
23 impaired release of free HIV did not predict outcomes for cell-cell HIV transfer. For cells  
24 with disabled Rac1/WAVE2 (Rac1<sup>-ve</sup>, Wave2<sup>k/o</sup> cells) cell-cell HIV transfer persisted (Fig. 7  
25 A&B), despite the decreased free virus budding ability. In contrast, disruption of the  
26 Cdc42/IQGAP1 axis (Cdc42<sup>k/o</sup> and IQGAP1<sup>-ve</sup> cells) impacted both HIV budding and cell-  
27 cell transfer (Fig. 7 A&B). These observations suggest that while normal actin dynamics are  
28 important for free virus release, Cdc42 and IQGAP1 are specifically required for cell-cell  
29 HIV transfer, whereas Rac1/Wave2 are not. To further test this hypothesis in the setting of  
30 primary CD4 T cell targets, we focussed cell-cell transfer assays with disruption of the Rac1-  
31 WAVE2 pathway versus disruption of Cdc42-IQGAP1. In this setting, we further tested the  
32 efficiency of cell-cell spread by limiting dilution of the infected donors into primary CD4 T  
33 cell co-cultures. Using this approach, we observed almost complete loss of cell-cell HIV  
34 transfer in Cdc42<sup>k/o</sup> and IQGAP1<sup>-ve</sup> clones, whereas cell-cell transfer persisted in Rac1<sup>-ve</sup>,  
35 Wave2<sup>k/o</sup> clones, albeit slightly lower than in WT cells (Fig. 7C). In cells lacking filopodia  
36 (CDC42 and IQGAP1), one immediate mechanism for lack of viral transfer could be the  
37 culmination of a limited contact capacity with the cells immediate microenvironment. To test  
38 this hypothesis, we enumerated accumulative cell to cell contacts (Fig. 7D) and later target  
39 cell engagement (Fig. 7E) in wild type, IQGAP1<sup>-ve</sup> and WAVE2<sup>k/o</sup> cells. IQGAP1<sup>-ve</sup> cells  
40 were observed to have significantly lower overall contacts and also engaged fewer cell  
41 targets. Whilst this addresses the lowered ability of cells without filopodia to participate in  
42 cell-cell transfer, it does not address the paradox of persistent cell-cell HIV  
43 transfer, despite reduced viral budding in cells with augmented filopodia. To resolved this  
44 further, we observed later interactions WAVE2<sup>k/o</sup> cells where filopodial networks are  
45 augmented following HIV infection. Filopodia initially persisted in early cell-cell conjugates,  
46 yet we routinely observed collapse of filopodial networks immediately preceding VS  
47 formation and HIV-GFP transfer to the opposing target cell (Fig. 7 F and Movie S6). As a  
48 surrogate of filopodial activity, we quantified this as membrane complexity through  
49 calculation of cellular circularity. In this setting, cells with extensive filopodial networks  
50 were observed to have low circularity, whilst cells with no filopodial activity were observed

1 to have high score in circularity. Measurements of Gag-polarisation over time then  
2 established measurements of the seeding of the VS and release of GFP into the neighbouring  
3 target was used to mark the final stage of VS maturation that culminated in viral transfer.  
4 Using this quantification in the representative live cell movie acquisitions (7 F &G), we  
5 observe cells engaged in cell-cell contact to approach a circularity of 1 (i.e. Cells collapsing  
6 their filopodial networks) just prior to the final stages of viral transfer, as marked initially by  
7 Gag polarisation and then subsequently observed in cytoplasmic transfer of GFP to the  
8 neighbouring cell (7G).  
9  
10  
11  
12  
13

## 1 Discussion

2

3 The corruption of cortical F-Actin by HIV has remained elusive, with evidence both for and  
4 against its role in budding and cell-cell viral spread. Through systematic depletion of various  
5 F-Actin regulators, combined with viral mutagenesis and high-resolution imaging, we were  
6 able to illuminate the intersection of HIV egress with cortical F-Actin and conclude this is  
7 primarily associated with the Cdc42-IQGAP1-Arp2/3 pathway.

8

9 Our primary aim herein was to understand how HIV egress was spatiotemporally connected  
10 to a continuum of cortical F-actin structures that dynamically regulated in leukocytes. Whilst  
11 many prior studies have mapped F-Actin pathways in cell-free systems, the challenge herein  
12 was to map F-Actin pathways and how they influenced not only the live virus, but also in a  
13 cellular & cytoskeletal setting that was consistent with that of the immune system. Whilst  
14 many F-Actin regulators are common across cells, F-Actin regulation in leukocytes is unique  
15 and enables a rapidly changing canvas of F-Actin polymers to coordinate their roles in the  
16 immune response. Processes such as chemotaxis, promiscuous cell-cell scanning and later  
17 stable cell-cell contacts are all processes dependent on dynamic cortical F-Actin. So in  
18 discussion of the how F-Actin influences HIV egress we need needs to to frame the  
19 discussion into two distinct events. Firstly, HIV's time at the leading edge of protruding F-  
20 Actin structures (target selection) and secondly, when infected cells engage in longer stable  
21 contacts (target engagement).

22

23 At the leading edge of F-actin, we observed HIV buds to be enriched where cortical F-actin  
24 structures induce strong positive curvature. However, curvature and/or formin activity alone  
25 were not sufficient to position HIV at the tips of filopodia. Thus, other actin regulators  
26 associated with membrane curvature must be involved. Our observations herein that HIV  
27 infection specifically enhances Cdc42-Arp2/3-dependent filopodia, supports a mechanism of  
28 action that corrupts this pathway of actin nucleation. While curvature provided by HIV  
29 during budding could itself drive filopodia formation (e.g by direct recruitment/activation of  
30 Cdc42/Arp2/3 [39,40], our observations support hijacking of a pre-existing pathway dependent  
31 on curvature. We base this reasoning three-fold. Firstly on uninfected myeloid cells there are  
32 similar long filopodia (albeit uncapped with HIV). Secondly most filopodia in infected cells  
33 are HIV-capped [9]. If HIV would provide an independent mechanism of filopodia  
34 formation, both structures would be expected to coexist. Thirdly and finally, HIV curvature  
35 mutants had a dominant negative effect on all filopodia, indicating i) a functional overlap of  
36 the viral and cellular pathways of filopodia formation, and ii) a critical role of Gag in  
37 hijacking of these structures. Recently, Sabo and colleagues observed HIV Gag to directly  
38 interact with IQGAP1 [41]. This observation is consistent with our observations herein at  
39 several levels. Firstly, as IQGAP1 binds to Cdc42 and stabilizes it in its active conformation  
40 to drive filopodia formation [36]. Secondly, as IQGAP1 also facilitates assembly of  
41 multiprotein complexes that spatially link Cdc42, Arp2/3 and formins [42]. This is consistent  
42 with how HIV is associated with a filopodial structure that is firstly nucleated by CDC42, but  
43 secondly elongated by the formin Diaph2. Finally, given the role of positive curvature in  
44 filopodia biogenesis, consumption of IQGAP1 by HIV Gag into an area of neutral curvature,  
45 is consistent with HIV Gag curvature mutants acting as dominant negative constructs for  
46 CDC42-Arp2/3 filopodia. Whilst the resolution of pathways that gives birth to HIV filopodia  
47 are now becoming clearer, the role of this hybrid viral and cellular structure now needs  
48 discussion. Typically, viral-cellular membrane events are associated with viral release. In  
49 contrast, we observed HIV's association with F-Actin to be inhibitory to HIV budding. The  
50 most evident is when HIV filopodial networks are formed during Rac1 and Wave2 depletion.

1 In that setting, the removal of Rac1 would not only bias signalling to CDC42, but with  
2 IQGAP1 recruited by HIV Gag, CDC42 would be maintained in an active GTP bound state  
3 [43]. This is entirely consistent with its role in filopodial formation but also its augmentation  
4 by HIV Gag-IQGAP1 during infection. Whilst arrest of viral HIV buds in a F-Actin structure  
5 may be a function of distance that this structure projects immature HIV from the membrane,  
6 the role of the virus in this setting is seems counter intuitive at two levels. Firstly, a virus that  
7 cannot undergo abscission at the membrane cannot subsequently mature [44] and as such this  
8 cannot contribute to viral spread. Secondly, it is well known HIV particles bud from infected  
9 cells. To reconcile both observations, we hypothesise leading edge structures positive with  
10 HIV can indeed indirectly contribute to cell-cell spread and that only a proportion of HIV  
11 buds at the membrane engage in this process. So in this setting, the virus at the leading edge  
12 of protruding F-Actin structures may indeed be hard-wired to coordinate the initial pre-  
13 synaptic contacts. Yet as cell-cell contacts mature, HIV's relationship with F-Actin we  
14 support observed to be reconfigured, as the inhibitory mechanisms observed during pre-  
15 synaptic events are overcome during cell-cell viral transfer. So to conclude, HIV's time at  
16 the leading edge of a cell we support to function primarily in pre-synaptic events. In this  
17 context, HIV's corruption of the leading edge does not contribute to viral release but directs  
18 initial cell-cell contacts.

19  
20 Shadowing and highjacking the Cdc42-IQGAP1-Arp2/3 actin regulatory axis is not a unique  
21 feature of HIV. Nascent viral buds have also been observed at the tips of filopodia-like  
22 structures for other types of viruses [45-50], and numerous intracellular pathogens are known  
23 to exploit Rho-GTPases and the unique ability of the Arp2/3 complex to promote formation  
24 of specialized cortical F-actin membrane protrusions that facilitate cell-cell infection spread  
25 [51-55]. Similarly, IQGAP1 is a prominent target of microbial manipulation and this is  
26 closely related to its ability to modulate the actin cytoskeleton (reviewed in [56]). Several  
27 viruses bind IQGAP1 either directly (via interactions with the viral matrix protein) or  
28 indirectly (via common binding partners) and this has important consequences for viral  
29 assembly, budding and/or pathogenesis [11,47,57-60]. For HIV, recent studies by Sabo and  
30 colleagues [41], have observed biochemically IQGAP1 interactions with NC & p6 elements of  
31 HIV Gag. In this study they support a role for IQGAP1 in negative regulation of HIV Gag  
32 trafficking and subsequent HIV-budding [41]. Whilst our observations readily support a role  
33 for IQGAP1 in influencing HIV budding, we did not observe this to be a consequence of  
34 negative regulation of Gag trafficking and docking to the membrane. For instance near  
35 complete removal of IQGAP1 did not increase viral budding and egress, but rather led to  
36 inhibition thereof. In light of our observations herein and those recently published [41], we  
37 would conclude that as IQGAP1 is a scaffolding protein with many binding partners, it is not  
38 surprising that HIV Gag has many different fates depending on each cell type it is expressed  
39 in and what functions that cell type maybe engaged over the time the cells were sampled.  
40 Importantly, we do readily support a role for IQGAP1 in the viral life cycle and this readily  
41 supports recent observations by this team.

42  
43 In terms of HIV spread, free viral particle release was susceptible to inhibition of both  
44 lamellipodial and filopodial regulators. In contrast, cell-cell spread of HIV was mainly  
45 dependent on Cdc42 and IQGAP1 but showed tolerance to depletion of Rac1/Wave2, despite  
46 a similar impact of all regulators on free virus budding. Together, these observations suggest  
47 that long filopodia specifically contribute to cell-cell HIV spread, whereas lamellipodia are  
48 less important for this process. This is consistent with findings from other enveloped viruses  
49 where filopodia have been associated with the ability to mediate cell-cell viral transfer [61-65].  
50 Indeed, we have previously observed HIV-Filopodia to mediate hundreds of contacts per

1 hour between relevant primary HIV target cells, with filopodial activity often preceding VS  
2 formation [9]. The latter is in agreement with previous observations that filopodia and/or  
3 dendrites may commonly serve as precursors for biological synapses [66-70]. It has also been  
4 proposed that, as synapses mature, filopodia must be “supressed to allow a smooth and broad  
5 cell-cell interface” [70]. This is consistent with our observations herein that early HIV donor-  
6 target cell contacts are characterized by abundant filopodial activity, whereas filopodia are  
7 often lost during late stages of VS formation, when polarization and transfer of Gag is most  
8 evident. These remarkable cell-shape changes reveal that VS progression involves extensive  
9 cytoskeletal remodelling and suggest a clear switch of actin-manipulation strategy as the  
10 synapse matures. Loss of filopodia likely requires inactivation of Cdc42, and this could be  
11 important to allow synchronised budding and large-scale viral release at the VS, in a similar  
12 manner to how Cdc42 inactivation promotes mechanistically analogous (i.e. ESCRT-  
13 dependent) abscission events during late stage cytokinesis. Thus, IQGAP1 may serve as a  
14 scaffolding center that enables coordination and cross-signaling of F-actin remodelling and  
15 abscission events during both cytokinesis and the VS. However, as with other synapses,  
16 maturation of the VS is a temporally and mechanistically complex process, and further  
17 studies will be required to fully elucidate the mechanisms involved.

18  
19 Overall, we propose that HIV has evolved to hijack a specific node of F-actin regulation  
20 that positions outgoing virus at the leading edge of cortical F-actin structures. Since filopodia  
21 play an important role in scanning of the microenvironment and mediating immune cell  
22 interactions, their corruption is beneficial to the virus because it biases the first line of cell-  
23 cell contacts towards HIV spread, e.g. by providing enhanced adhesion and specificity to  
24 CD4+ target cells. However, as these contacts form and the VS matures, the relationship of  
25 HIV with F-Actin changes and observations herein support this change to facilitate final viral  
26 release. We conclude that manipulation of the Cdc42-IQGAP1-Arp2/3 actin regulatory node  
27 is essential for corruption of the cells leading edge to facilitate cell-cell HIV spread, and  
28 observations support a key role for IQGAP1 also during later cell-cell contact. Moving  
29 forward, greater spatiotemporal resolution of this latter events is needed and will give further  
30 insight into why many pathogens like HIV have evolved to interact with IQGAP1 and its  
31 binding partners.

32  
33



1

2

3

## Materials and Methods

4

5

### **HIV Plasmid constructs:**

6 Plasmid constructs used herein are all based on CCR5 using pNL43AD8<sup>ENV</sup>, unless otherwise  
7 indicated (Table SI). All details regarding GFP carrying HIViGFP and HIViGFP<sup>ENV-ve</sup>,  
8 including the insertion of GFP in Gag polyprotein, have been previously described [9]. HIV  
9 nucleocapsid mutant (gag-p7<sup>-ve</sup>-LZ) was generated using a two-step cloning strategy wherein  
10 a 861 bp fragment carrying the HIV Capsid domain, P2 spacer region and the leucine zipper  
11 domain of yeast transcription factor GCN4 (herein LZ) was amplified from plasmid pRR546,  
12 a kind gift from Dr A Rein (NCI, USA)[28]and shuttled into HIViGFP using *XbaI/ApaI* cut  
13 sites. The intermediate plasmid (HIV<sup>LZ1stGen</sup>) thus generated had most of the NC domain  
14 replaced with LZ domain except for a 75 bp region proximal to the p6 domain. To remove  
15 this fragment and have the LZ domain contiguous with the p6 domain, primers were designed  
16 to amplify a 760 bp fragment from HIViGFP containing the p6 domain and Pol region  
17 proximal to *SbfI* restriction site while simultaneously introducing an *ApaI* restriction site at  
18 the 5'end. The resulting amplicon was then shuttled into HIV<sup>LZ1stGen</sup> using *ApaI/SbfI* cut sites  
19 to generate gag-p7<sup>-ve</sup>-LZ. Capsid mutant constructs gag-Capsid-EE75,76AA and gag-  
20 Capsid-P99A were generated by site directed mutagenesis wherein the reverse primers were  
21 designed to include the desired mutations. For gag-Capsid-EE75,76AA, a 320 bp fragment  
22 downstream of GFP was amplified from HIViGFP with the mutagenesis primers carrying the  
23 respective mutations (EE75,76AA) and re-cloned into the parental construct using *XbaI/SphI*  
24 unique sites while for gag-Capsid-P99A a 370 bp fragment downstream of GFP was  
25 generated with the mutagenesis primers carrying the point mutation, P99A, and shuttled back  
26 using *XbaI/SpeI* sites. HIV p6 deletion mutant gag-p6<sup>-ve</sup> was synthesised by cloning a 1.5 kb  
27 fragment from plasmid L1-term, courtesy Dr Eric Freed, NIH, USA, into HIViGFP using  
28 *SpeI/SbfI* restriction sites. The construct L1-term carries a stop codon at the start of p6  
29 domain of Gag in pNL43 and has been described in detail elsewhere {11805336}.  
30 pHIVNL43IRESeGFP (Courtesy of Dr Paul Cameron, Doherty Institute, Melbourne)  
31 expresses eGFP in the Nef open reading frame followed by an IRES element and the intact  
32 HIV Nef open reading frame. All of the above clones were sequence verified and transfected  
33 into HEK F293T cells (Invitrogen) as previously described[9].

34

35

### **Virus production and infections:**

36

37

38

39

40

41

42

43

44

45

46

47

48

49

50

In order to examine Gag mutations in context of infectious virus, we generated viruses  
capable of single round of infection by 'rescuing' HIViGFP Gag mutants with a 2<sup>nd</sup>  
generation lentiviral packaging construct psPAX2 (courtesy of Dr Didier Trono through NIH  
AIDS repository). The latter construct expresses wild type HIV Gag and Gag-Pol under a  
CMV based promoter and enables HIV genomes encoding the indicated Gag mutants to be  
packaged into viral particles (consisting of both mutant and WT Gag proteins) and  
importantly entering and infecting cells in a single round of infection. As psPAX2 only  
supplies WT Gag and Gag-Pol at the protein level, following infection, only the products of  
the mutant HIV genome are expressed (i.e. only the Gag mutant protein). To generate  
'rescued' HIViGFP Gag mutants viral stocks for U937 infections, the mutant constructs were  
co-transfected with psPAX2 and also the VSVg plasmid pMD2.G (Addgene; courtesy of Dr  
Didier Trono) at a molar ratio of 2:1:1 to increase the infection rate. Transfections were done  
in HEK F293T cells using polyethylenimine (at 1mg/ml, pH 7.0) as described previously [9].  
For cell to cell transfer assays, pHIVNL43IRESeGFP was used and was produced by  
polyethylenimine transfections of HEK F293T cells. TZM-bl indicator cell line (courtesy of



1 the AIDS reagent repository) was used for virus titering and analysis as previously  
2 described[9].

3

#### 4 **Lentiviral constructs and production:**

##### 5 *Diaph2<sup>CA</sup> mutant construct*

6 Lentiviral plasmids expressing the constitutively active form of Diaph2  
7 (pLVXdeltaDADmcherry) fused to mCherry was synthesised using the *XhoI/ApaI* restriction  
8 sites. The 30 bp autoregulatory domain (DAD) of Diaph2 with the consensus sequence  
9 DET(G/A)(V/A)MDXLLEXL(KIR/Q)X(G/A)(S/G/A)(A/P) spans aa 1051-1081 at the C-  
10 terminus and was removed from Diaph2 cDNA during cloning. Forward and reverse primers  
11 carrying the above restriction sites were designed to amplify a 3kb fragment from Diaph2  
12 MGC human cDNA clone (Dharmacon) and the amplicon encompassing the entire cDNA  
13 sequence minus the DAD domain was cloned into pLVX-mCherry-N1 (Clontech) to generate  
14 lentiviral expression vector pLVXdeltaDADmcherry. The plasmids were sequence verified  
15 and lentiviral particles were then generated using the helper plasmid, psPAX2 and pMD2.G  
16 as previously described[9].

17

##### 18 *Lentiviral shRNA vectors*

19 shRNA sequences for each gene target were obtained from The RNAi Consortium (TRC)  
20 library database and sequences with high adjusted scores (2 shRNA sequences per gene) were  
21 selected for synthesis (Table SII). Oligonucleotides (both sense and antisense) carrying  
22 *AgeI/EcoRI* sticky ends, hairpin loop sequence and shRNA sequence were synthesised (IDT  
23 technologies) and annealed oligos cloned into pLKO.1 TRC cloning vector (Addgene  
24 #10878) using the unique *AgeI/EcoRI* sites. A pool of two shRNA plasmids per gene was  
25 then packaged into lentiviral particles using psPAX2 and pMD2.G as previously described[9].  
26 Alternatively and where indicated, shRNA plasmids (pool of three shRNA plasmids per  
27 target) were obtained directly from Santa Cruz.

28

##### 29 *Lentiviral CRISPR vectors*

30 The SpCas9 and guide RNA (gRNA) CRISPR components were both expressed from the  
31 one-vector lentiviral system “lentiCRISPR\_v2” {25075903} (Addgene #52961). gRNA  
32 sequences for target genes were designed by submitting the sequence of an early exon  
33 (common to all isoforms) into the CRISPOR prediction tool{Concordet, 2018 #1425}, so that  
34 frameshifts in this region would result in at least 70% loss of native protein sequence. gRNAs  
35 were selected to meet the tool’s specificity-score requirements and to have at least 4 base pair  
36 mismatches with any other exon in the human genome (Table SIII). gRNA oligos were  
37 ordered from IDT-Technologies and cloned into the lentiviral vector as outlined by Zhang  
38 and colleagues {25075903} ([http://genome-engineering.org/gecko/wp-  
39 content/uploads/2013/12/lentiCRISPRv2-and-lentiGuide-oligo-cloning-protocol.pdf](http://genome-engineering.org/gecko/wp-content/uploads/2013/12/lentiCRISPRv2-and-lentiGuide-oligo-cloning-protocol.pdf)).

40

#### 41 **Cell culture, genetic modification and infection:**

42 Monocytic cell line U937 (ATCC® CRL1593.2™) cultured in RPMI (Thermoscientific)  
43 supplemented with 10% FCS (Invitrogen) was used in all experiments, unless otherwise  
44 stated. The identity of the U937 cell line used throughout this study was verified by  
45 microsatellite profile analysis by a NATA accredited third party institution (Garvan Institute,  
46 Sydney) and was confirmed to match the U937 cell line in the ATCC and SMZ databases.  
47 The cells were maintained at a density of around 0.5 - 1 x 10<sup>6</sup> per ml and passaged every 3 to  
48 4 days. Although HEK F293T and TZMbl cells lines were not verified by microsatellite  
49 profile analysis, unique cellular resistance and phenotypic properties of cells were used to  
50 ensure purities were maintained. For HEK F239T, this was G418 resistance and the ability to

1 produce HIV viral particles post transfection with the vectors used herein. For the TZMbl  
2 line, the ability to be infected by both CCR5 and CXCR4 tropic HIV strains in addition to  
3 their ability to produce luciferase and/or  $\beta$ -galactosidase post infection was used to ensure  
4 purities were maintained. All cell lines used in this study were tested to be free of  
5 mycoplasma using Mycoalert (Lonza).

#### 6 *shRNA depletion*

8 For shRNA knockdown in U937 cell lines, cells were transduced with lentivirus stocks  
9 expressing respective shRNA at an MOI of 1.0 and transduced cells selected by passaging in  
10 media containing puromycin (2 $\mu$ g/ml) (Invitrogen) or hygromycin (400 $\mu$ g/ml) (Invitrogen)  
11 for 2 weeks. For double knock down cells, transduced cells stably expressing single gene  
12 knockdowns were infected with lentivirus carrying the shRNA for the second target and  
13 transduced cells selected by addition of both puromycin and hygromycin to culture media at  
14 the above mentioned concentrations.

#### 15 *CRISPR gene knock outs*

17 For gene-editing using CRISPR vectors, U937 cells were transduced at a MOI of 0.5, and  
18 selected in puromycin-containing medium (2 $\mu$ g/ml) for 7 days.

#### 19 *Clonal sorting, depletion and knock out confirmation*

21 Clonal populations for the above-mentioned transduced cell lines were generated by single  
22 cell sorting using ARIA flow cytometer (BD Biosciences) into complete RPMI media that  
23 was pre-conditioned for 24 hours with the U937 cell line cultured at  $2 \times 10^5$  cells per ml.  
24 Approximately 30% of single cell colonies survived and were grown to confluency. Initially  
25 5 clones were selected for live imaging and F-Actin phalloidin staining to reveal any readily  
26 observable changes in cortical F-Actin architecture (e.g. Loss of filopodia). Clones were then  
27 verified for shRNA depletion and gene knockdown at the protein level was verified by  
28 western blotting of cell lysates using the following antibodies: anti-Arp2 rabbit, polyclonal  
29 (Santa Cruz; SC-15389; Lot L-2109), anti-Arp3 mouse, monoclonal (Abcam; AB49671; Lot  
30 GR450638), anti-Diaph1 rabbit, polyclonal (Bethyl laboratories; A300-077A; Lot A300-  
31 077A-2), anti-Diaph2 rabbit, polyclonal (Bethyl laboratories; A300-079A; Lot A300-079A-  
32 2), anti-Diaph3 rabbit, polyclonal (Protein tech; 14342-1-AP; Lot 5399), Anti-Rac1  
33 monoclonal (Protein Tech; 66122-I-Ig; Lot 10011346 ) and anti-IQGAP1 monoclonal  
34 (SantaCruz; sc-376021; Lot H1417 ) antibodies. In the absence of working antibodies to  
35 verify protein target depletion, RT-Q-PCR was performed on FMNL-1 (HS00979762\_m1)  
36 using Applied Biosystems TaqMan Gene Expression assays and fold change depletion in the  
37 shRNA depleted cells was determined by comparison to scrambled shRNA transduced cell  
38 controls. In supplementary Figure S3, raw data (immunoblotting of cellular lysates) is  
39 presented on the clonal cells primarily used in this study. Where possible, CRISPR/Cas9 was  
40 used to confirm shRNA depletion phenotypes and also to generate cells where the target  
41 protein expression was knocked out. Successful gene editing in clonally expanded  
42 populations was confirmed by genomic PCR and DNA sequencing with a pair of target-  
43 specific “surveyor” primers designed to amplify the gene region targeted by the gRNA (all  
44 surveyor primers used are listed in Table SIII). Genomic DNA extraction from CRISPR-  
45 edited cells was performed as described in {Guschin, 2010 #129}. Briefly,  $1 \times 10^6$  cells  
46 were pelleted, the cell pellet resuspended in 100 $\mu$ L QuickExtract solution (Lucigen  
47 #QE09050), transferred to PCR-tubes and incubated in a thermocycler for 15 minutes at 68 $^{\circ}$ C  
48 , followed by 8 mins at 95 $^{\circ}$ C and then held at 4 $^{\circ}$ C until further use. Of this cell-lysate  
49 solution, 2 $\mu$ L were used as template for genomic PCRs in a 50  $\mu$ L reaction with Velocity  
50 DNA Polymerase (Bioline#21098) following the manufacturer’s instructions. DNA Sanger

1 sequencing was performed by a NATA-accredited core facility (Garvan Institute, Sydney).  
2 Sequencing data was analysed using Sequence Scanner Software v2.0. Note that in the  
3 context of this work, the term knockout (k/o) refers to cellular clones where both gene copies  
4 have been edited in a way that results in loss of native protein expression due to introduction  
5 of frameshifts or premature stop codons in the protein coding sequence. For representative  
6 sequencing data of Cdc42<sup>k/o</sup> and Wave2<sup>k/o</sup> cell clones, see Fig. S4.

### 8 **Quantitative cell to cell virus transfer assays:**

9 Primarily viral transfer assays utilised various U937 clones with shRNA depletion or gene  
10 knock outs where indicated. Donor cells were infected at an MOI of 1.0 with VSVg  
11 pseudotyped pHIVNL43IRESeGFP by spinoculating at 1200 x g for 1 hour at 18°C. 48 hours  
12 post infection, the proportion of infected cells was enumerated by measuring GFP expression  
13 via flow cytometry.

14  
15 Unless otherwise stated, viral transfer assays used the HIV permissive HeLa cell line TZM-bl  
16 cells. 5000 infected donor cells normalised to 40% infection were added to 20,000 TZM-bl  
17 cells (labelled with “ThermoFisher-C34565: CellTracker Deep Red dye” and seeded on the  
18 previous day) in a flat bottom 96-well plate (donor to target ratio = 0.25, final well volume =  
19 200 µl). Viral transfer was stopped after 18 hours coculture by adding the gp120/  
20 CD4 inhibitor BMS-378806 (Selekchem #S2632) to a final concentration of 10 µM. At 48  
21 hours coculture, donor cells were removed by washing twice in PBS. In all cases, the number  
22 of infected recipient cells (GFP and Alexa647 double positive, single cells) were enumerated  
23 by fluorescence microscopy using the high content CYTELL imaging platform (GE  
24 Healthcare). An average of 25,000 cells were analysed per condition by acquiring multiple  
25 fields of view.

26  
27 In virus transfer assays that used primary CD4+ T cells as targets, primary CD4+ T cells  
28 were isolated from whole blood. Healthy donors were consented under St Vincent’s Hospital  
29 ethics #HREC/13/SVH/145. Briefly, blood from each consenting donor was collected into  
30 approximately 10x 9ml ACD-B Vacuette tubes (Greiner, Cat# 455094; Lot#A180437V).  
31 Blood was then pooled and diluted 1 in 2 with sterile PBS and then subsequent CD4 T cell  
32 isolation proceeded as previously described[9]. Following isolation, cells were activated using  
33 T Cell TransAct™ (Miltenyi Biotech) for 24 hours according to manufacturer’s instructions.  
34 CD4+ T cell activation was measured by upregulation of CD69 (Becton Dickinson Clone  
35 L78; Lot 41209) and CD25 (Becton Dickinson Clone 2A3; Lot 25912) surface marker  
36 expression using flow cytometry. 10<sup>5</sup> primary activated CD4+ T cells were added per well to  
37 a U-bottom 96-well plate in 100µl of RPMI supplemented with 10% fetal calf serum.  
38 Following extensive washing and normalisation of infection to 5%, 5000 donor cells per 50µl  
39 of media were serially diluted at steps of 1 in 5 dilution and added to recipient cells in a final  
40 co-culture volume of 150µl. Four days post co-culture, cells were thoroughly resuspended  
41 and added to wells of a 96-well flat bottom tissue culture plate that had been previously  
42 coated with poly-L-Lysine as per manufacturer’s instructions (Sigma-Aldrich). As mentioned  
43 above GFP positive HIV infected cells were enumerated by fluorescence microscopy using  
44 the high content CYTELL imaging platform (GE Healthcare). An average of 25,000 cells  
45 were analysed per condition by acquiring multiple fields of view. Under the above  
46 conditions, viral transfer is primarily observed to be cell-cell, as supernatants from infected  
47 cells cultured alone over this period did not result in significant infection when added to the  
48 same target cell types. In addition, the inclusion of the antiretroviral reverse transcriptase  
49 inhibitor Efavirenz to co-cultures block eGFP expression within the target cell population (ie.  
50 The GFP signal is not consistent with simple endocytosis in the target cell type).

1

## 2 **Quantitative analysis of live cells during viral transfer:**

3

### 4 Cell-cell contacts

5 The cumulative number of contacts between each infected donor cell and any uninfected  
6 target cells (TZM-bl) was determined via frame-by-frame inspection of 3h time-lapse  
7 movies. Each contact was recorded as a finished track using ImageJ's MTrackJ plugin [71].  
8 N>50 cells from two independent experiments were analysed for each group. Cells that exit  
9 the field of view were excluded from analysis. Whilst this enumerated absolute number of  
10 contacts, cell to cell engagement was enumerated when infected donor cells were contacting  
11 the same uninfected target cells for a duration greater than 5 minutes.

12

### 13 Cellular circularity vs Gag-polarisation

14 At the virological synapse, donor-cell circularity was calculated using the circularity  
15 measurement function in ImageJ (<https://imagej.nih.gov/ij/plugins/circularity.html>), where  
16  $c=1$  indicates a perfect circular shape. Gag polarization was calculated as  $(IntP/IntD)-1$ ,  
17 where IntP is the GFP intensity signal at the proximal cell quarter (i.e. contacting the target  
18 cell), whereas IntD is the intensity at the distal cell quarter. A polarization value of 1  
19 indicates 100% enrichment in the proximal quarter.

20

### 21 **Immunofluorescence microscopy:**

22 For live and fixed cell imaging,  $0.5 \times 10^6$  cells were infected with HIV stocks at an MOI of  
23 0.1 for 48 hours under standard culture conditions before analysis.

24

25 Live cell imaging was performed as described previously using an inverted Olympus IX-70  
26 microscope with 60 x 1.42 NA oil immersion lens and an Evolve 512 back-thinned EM-CCD  
27 camera (512\*512) (DeltaVision ELITE Image Restoration Microscope, GE Healthcare). For  
28 time-lapse movies, approximately  $5 \times 10^4$  cells were seeded onto a 35mm imaging dish with  
29 ibidi polymer coverslip bottom (#1.5) (Ibidi, Martinsried, Germany) and eGFP and DIC  
30 channels imaged at approximate 2 frames/sec, with time lapse movies presented as overlays.  
31 Manual single particle tracking was done using ImageJ with MTrackJ plugin and filopodial  
32 lengths calculated as described previously[9]

33

34 For counting virus particles, wells of a 96 well Sensoplate, glass bottom, black (Greiner Bio-  
35 One International GmbH) were coated with poly-L-lysine according to manufacturer's  
36 instructions (Sigma-Aldrich). 50 $\mu$ l of virus supernatant was serially diluted at 1 in 5 dilutions  
37 steps and then added to each well and plate spun at 2500 x g for 40 minutes at RT followed  
38 by fixation with 4% formaldehyde (v/v) for 20 minutes at room temperature. Fluorescent  
39 virus particles were then imaged using DeltaVision Elite microscope described above and a  
40 total of five fields of view per well were acquired in the GFP channel. Viral particles were  
41 then enumerated using ImageJ using the 2D/3D particle tracker in MosaicSuite (MOSAIC  
42 Group, Dresden).

43

44 For fixed cell imaging,  $5 \times 10^5$  cells were cytopun onto 22 x 60 mm #1.5 coverslips (VWR  
45 international, Batavia, IL), pre-coated with CellTak (Corning), and then fixed in 4%  
46 formaldehyde solution (v/v) for 20 minutes at room temperature followed by neutralization  
47 with 50 mM NH<sub>4</sub>Cl (Sigma) for 3 minutes. Cells were permeabilized with 0.05% Triton-X  
48 (Sigma) for 1 minute at room temperature, stained with indicated mAbs in the presence of  
49 5% serum, followed by the appropriate secondary antibody. For staining filamentous actin  
50 (F-actin), cells were stained with directly conjugated Alexa Fluor-647 Phalloidin



1 (ThermoFisher Scientific) for 20 minutes at room temperature prior to mounting in Prolong  
2 Gold antifade mountant with DAPI (ThermoFisher Scientific). Cells were visualised with a  
3 100 x 1.4 NA oil immersion lens using a DeltaVision Elite microscope and a Photometrics  
4 CoolSnap QE camera. Images were acquired as 50 to 60 optical sections, 0.15 $\mu$ m to 0.20 $\mu$ m  
5 in thickness, deconvoluted and volume projections generated using DeltaVision SoftWorx  
6 software, version 7.0. Unless otherwise stated, all fixed cell data presented herein are Z-series  
7 volume projections.

### 9 **Correlative FIB-SEM:**

10 In order to perform Correlative FIB-SEM,  $0.5 \times 10^6$  U937 cells were infected with HIViGFP<sup>Env</sup>  
11 at an MOI of 0.1. 48 hours post-infection, cells were washed twice, resuspended in warm  
12 RF-10 and incubated at 37°C, 5% CO<sub>2</sub> for a further 30 minutes. This was done to allow the  
13 cells to recover the filopodial activity post washing steps. 100 $\mu$ l of cell suspension was then  
14 added to a gridded 35mm glass bottom dish (# 2) from MatTek Corporation (MA, USA), that  
15 had been pre-coated with CellTak according to manufacturer's instructions. Cells were  
16 cytopspun at 80 x g for 1 minute before fixing in fresh 4% (v/v) formaldehyde. Cells were then  
17 imaged using DeltaVision Elite microscope, infected cells identified by GFP expression and  
18 the grid coordinates noted. Cells grown and imaged on gridded coverslips as described above  
19 were further fixed in Karnovsky's fixative prior to transport. The samples were then post-  
20 fixed, stained and resin embedded as previously described [20].

22 Data collection was performed on a Zeiss Crossbeam 540 FIB-SEM (Zeiss Inc., Germany)  
23 controlled by ATLAS3D (Fibics Inc, Canada), as follows. Since the cells were adhered, after  
24 the cover slips were removed, the outlines of the cell membranes were just under the top resin  
25 surface and could be visualized using a scanning electron beam operated at 3 kV. The pattern  
26 of the gridded coverslip was also transferred to the resin surface, allowing correlation with  
27 the light microscopic images and location of specific cells of interest. These cells were  
28 protected by depositing a layer of platinum on top of the resin, effected by the FIB operated  
29 at 700 pA and 30 kV. Notches were FIB milled (at 50 pA) into the platinum to monitor and  
30 adjust for specimen drift x, y and z directions as well as beam tuning in real time during data  
31 acquisition. Image contrast was achieved by FIB-depositing (at 700 pA) a layer of carbon  
32 atop the platinum, and the cells were exposed from the side by FIB milling a trench in the  
33 resin at 30 nA followed by 3 nA until the plasma membrane was reached.

35 During data collection, the FIB and SEM were operated simultaneously, at 30 kV, 700 pA  
36 and 1.5 kV, 1 nA, respectively. The EsB detector was operated at a 900V grid voltage to  
37 produce a 2-D stack of images composed of predominantly back-scatter electronic signal.  
38 The SEM pixel size was set at 3 or 4 nm and total dwell time of 4  $\mu$ s, and FIB step size set at  
39 9 or 12 nm. The resulting stack of images were aligned, binned, denoised and inverted with  
40 IMOD based scripts {Kremer, , 8742726} to yield isotropic 3-D image volumes.  
41 Segmentation of these reconstructions was completed using Amira (ThermoFisher Inc) or  
42 3DSlicer {Fedorov, , 22770690}. Sub-volumes of veils and filopodia were extracted from  
43 these data and fiducials were placed at the locations of budding virions, which could be easily  
44 observed. Thus the number and location of individual virions as well as the surface area of  
45 veils and filopodia could be quantified using available modules in the XimagePAQ extension  
46 for Amira. This extension was also used to calculate mean curvature of veils and filopodia;  
47 areas with negative curvatures were named "base" positive curvature as "ridge" or "tip",  
48 respectively, and neutral curvature as "face" or "shaft", respectively. Representative features  
49 were false colored on a spectrum corresponding to negative (red) to positive (blue) mean  
50 curvatures.

1

## 2 **Mass spectrometry of purified virions:**

3 Parental and mutant U937 cell lines were infected with HIViGFP<sup>ENV-ve</sup> at an MOI of 0.3 and  
4 after overnight culture cells were washed three time in fresh media to remove the residual  
5 inocula. Culture supernatants were then pooled after a harvest at 48 hours and 96 hours post  
6 infections. Virion preparations were depleted with antiCD45 paramagnetic microbeads  
7 (Miltenyi Biotech cat# 130-045-801) as described previously[32] with following  
8 modifications: Clarified cell culture supernatants were incubated with continuous mixing for  
9 1hour at room temperature with anti-CD45 microbeads at a concentration of 4 $\mu$ l beads per ml  
10 of supernatant. CD45 immunoaffinity depleted supernatants were then separated from beads  
11 by placing in magnetic separators followed by centrifugation at 28,000 x g for 90 minutes at  
12 4°C to pellet virions. Pelleted virions were resuspended in PBS and lysed using 4xLDS  
13 sample buffer (BOLT, Invitrogen). CD45 microvesicle depletion was determined by western  
14 blotting as previously described [32]. Samples were subsequently separated by SDS-  
15 Polyacrylamide gel electrophoresis using 1mm thick 4-12% Bis-Tris gel (Invitrogen),  
16 followed by staining with Instant Blue Coomassie stain (Expedeon Inc, USA). Each virion  
17 containing lane was divided into 18 contiguous sections and each section then subjected  
18 individually to In-Gel digestion protocol{8962070}. Briefly, gel slices were de-stained (50%  
19 (v/v) acetonitrile, 50mM NH<sub>4</sub>HCO<sub>3</sub>), reduced (10mM DTT in 50mM NH<sub>4</sub>HCO<sub>3</sub>) and  
20 alkylated (55mM Iodoacetamide in 50mM NH<sub>4</sub>HCO<sub>3</sub>) before being trypsinised with 100ng of  
21 Trypsin (Promega) for 16h at 37°C. Gel slices were then treated with the following solutions  
22 sequentially for 1hour each at RT: 50% (v/v) acetonitrile/0.1% (v/v) formic acid and 100%  
23 acetonitrile. Samples were then dried in a centrifugal concentrator before resuspending in  
24 20 $\mu$ l of 0.1% (v/v) formic acid.

25

## 26 *Mass spectrometry*

27 Proteolytic peptide samples were separated by nano-LC using an UltiMate 3000 HPLC and  
28 autosampler system (Dionex, Amsterdam, Netherlands) and eluting peptides ionized using  
29 positive ion mode nano-ESI following experimental procedures described previously{  
30 22083589}. MS and MS/MS were performed using a Q Exactive Plus mass spectrometer  
31 (Thermo Scientific, Bremen, Germany). Survey scans  $m/z$  300–1750 (MS AGC =  $3 \times 10^6$ )  
32 were recorded in the Orbitrap (resolution = 70,000 at  $m/z$  200). The instrument was set to  
33 operate in DDA mode, and up to the 12 most abundant ions with charge states of  $>+2$  were  
34 sequentially isolated and fragmented via HCD using the following parameters: normalized  
35 energy 30, resolution = 17,500, maximum injection time = 125 ms, and MS<sub>n</sub> AGC =  $1 \times 10^5$ .  
36 Dynamic exclusion was enabled (exclusion duration = 30 s).

37

## 38 *Sequence database searches and protein quantification*

39 Sequence database searches were performed using MaxQuant (version 1.5.8.0), run using  
40 standard parameters using the Andromeda sequence database search utility. Andromeda was  
41 employed using the following parameters: precursor ion and peptide fragment mass  
42 tolerances were  $\pm 4.5$  ppm and  $\pm 0.5$  Da respectively; carbamidomethyl (C) was included as a  
43 fixed modification; oxidation (M) and N-terminal protein acetylation were included as  
44 variable modifications; enzyme specificity was trypsin with up to two missed cleavages; and  
45 Human sequences in the Swiss-Prot database (February 2017 release; 20,168 Human  
46 sequence entries) were searched. Searches were performed with the “match between runs”  
47 feature selected, and proteins identified in each gel lane were quantified using the MaxLFQ  
48 algorithm employed using standard parameters.

49

## 50 *Statistical tests*



1 OriginPro (Version 9.0; Originlab Corporation) was used to perform statistical analyses and  
2 generate graphs, unless otherwise specified. Unless otherwise stated, the data from 2 groups  
3 were compared, normal distributions were tested using a Shapiro-Wilk test and for normally  
4 distributed data the probability that the mean of each group was significantly different was  
5 evaluated using an unpaired Student's *t* test. For data that is not normally distributed, the  
6 probabilities were determined using the Mann-Whitney *U* test. Unless otherwise stated,  
7 statistics are summarised in figures as \* $p < 0.01$ , \*\* $p < 0.001$  & \*\*\* $p < 0.0001$ . All data  
8 presented herein is representative of a minimum of 3 independent replicates. Where  
9 appropriate, the distribution of raw data is presented and no outlying datasets have been  
10 excluded for statistical analysis.

11

#### 12 *Availability of reagents*

13 With the exception of plasmid constructs that encode for full length HIV, the majority of  
14 constructs herein will be submitted to Addgene for distribution. Constructs not available on  
15 Addgene, will be available upon request. Plasmids encoding full length HIV will be made  
16 available upon request, providing the requesting laboratory has the appropriate import permit  
17 and biological containment facilities and approvals.

18

#### 19 *Human ethics statement*

20 Herein all authors state and confirm that they have complied with all relevant human ethical  
21 regulations outlined under ethics approval # HREC/13/SVH/145 (St Vincent's Hospital  
22 Sydney, NSW, Australia) to obtain whole blood for research purposes.

23

#### 24 *Data availability statement*

25 Due to the large size of files datasets generated in figures 1, 2, 4, 5 and 7, the data will be  
26 available using the Dryad Data Repository.

27

28

29

1 **References**

2

3 Figure legends

4

5 **Figure 1. Depletion of F-actin regulators reveals long filopodial networks to be driven**  
6 **by Arp2/3 and Diaph2.**

7 A. F-Actin staining by phalloidin Alexa-647 reveals extensive and long filopodia in  
8 uninfected scramble shRNA control cells (Scr-CTL), short abundant filopodia upon deletion  
9 of the formin Diaph2, and extensive lamellipodia when both Diaph2 and Arp2/3 are co-  
10 depleted. B. Schematic representation of FIB-SEM imaging data. C-E. FIB-SEM 2D images  
11 (upper) and 3D reconstructions (lower) of C. non-depleted control cells (Scr-CTL), D.  
12 Diaph2-depleted cells and E. Diaph2 and Arp2/3 co-depleted cells. All scale bars are 5µm. F-  
13 H. Schematic representation of phenotypes induced by loss of F-Actin regulators. F.  
14 Wildtype scenario, G. Diaph2 deficiency, H. Diaph2 & Arp2/3 deficiency. Note in H. we  
15 represent reduced levels of Arp2/3, given its high cellular abundance and residual levels of  
16 Arp2/3 in our knockdown cells (Fig. S3).

17

18

19 **Figure 2. HIV budding enriched to positively curved cortical F-Actin.**

20 A-D Representative FIB-SEM images of HIV virions associated with B. Filopodia and C-D  
21 plasma membrane of a HIV infected cell depleted of Diaph2. E-F. 3D rendering FIB-SEM  
22 images of HIV infected E. Diaph2<sup>-ve</sup> and F. Diaph2<sup>-ve</sup>Arp2/3<sup>-ve</sup> cell clones. HIV buds are  
23 shaded in red to highlight their location. G&J. enumeration of HIV-buds in association with  
24 positively curved cortical F-Actin structures. G. Filopodia and J. lamellipodia are  
25 pseudocolored using a colour spectrum from blue (positive curvature), green (neutral  
26 curvature) to red (negative curvature). H-I Enumeration of total HIV buds in association with  
27 the filopodia in Diaph2<sup>-ve</sup> cells. H. Absolute viral bud counts and I. HIV bud density per µm<sup>2</sup>.  
28 K-L. Enumeration of total HIV buds in association with the lamellipodia in Diaph2<sup>-ve</sup> Arp2/3<sup>-ve</sup>  
29 cells. K. Absolute viral bud counts and L. HIV bud density per µm<sup>2</sup>. All scale bars are  
30 0.5µm with the exception of B-D, which is 0.1µm. Bar graphs in H-I represent mean and  
31 standard deviations of virion counts from n = 15 filopodial structures. K-L bar graphs  
32 represent mean and standard deviations of virion counts from n = 15 lamellipodial structures.  
33 Statistics for panels G-L are summarised in Table SI. \*P>0.05

34

35 **Figure 3. Constitutively active Diaph2 driven Filopodia are not associated with HIV**  
36 **buds.**

37 A & B. Live still images from supplement Movie S3; A. <sup>C/A</sup>Diaph2-mCherry (red) positive  
38 cells, infected with B. HIViGFP (green). Note Diaph2 at the tips of filopodia are negative for  
39 HIV. Scale bars are at 5µm. C. Quantification of HIV positive filopodia per cell in HIV  
40 infected live cell cultures. HIV filopodia counts are derived from three independent HIV  
41 infections \*\*\*p<0.0001. D&E. Immunofluorescent Arp2/3 staining of D. <sup>C/A</sup>Diaph2-  
42 mCherry (red) positive cells and E. Untreated cells. Asterisks highlight the terminal ends of  
43 filopodia that are either Diaph2 positive & Arp2/3 negative (for <sup>C/A</sup>Diaph2-mCherry) or  
44 Arp2/3 positive (for untreated cells).

45

46 **Figure 4. HIV Gag curvature mutants can impact Arp2/3 dependent cortical F-Actin**

47 A-E HIV Gag mutants used. A. Wild type HIV Gag. B. HIV Gag late domain mutant with p6  
48 deleted. C. NC deletion mutant with the Leucine Zipper (LZ) derived from *Saccharomyces*  
49 *cerevisiae* GCN4 to rescue Gag oligomerisation. D&E. HIV Gag curvature mutants D. P99A  
50 and E. EE75,76AA. F. Enumeration of filopodia per cell in Diaph2<sup>-ve</sup> cell clones.

1 \*\*\*= $p < 0.0001$ . G-H Representative FIB-SEM 3D rendered images of G. WT versus  
2 curvature mutants H. P99A and I. EE75,76AA. Data is derived from three independent HIV  
3 infections using each mutant.

4

5 **Figure 5. Cortical F-Actin regulators enriched at the final stages of HIV egress are**  
6 **revealed through HIV proteomics.**

7 A-B Viral proteome analysis of proteins associated with cortical F-Actin regulation. Proteins  
8 with increased abundance relative to untreated cells are shown in green, whereas those with  
9 relative decreased abundance are shown in red. A. Virions produced in Diaph2<sup>-ve</sup> cells. 1.  
10 Highlights the Arp2/3 complex node where the amounts of ACTR2 and Cdc42 are increased  
11 in virion proteomes. 2. Indicates a GTPase node in association with IQGAP1. 3. Highlights a  
12 node of integrin and related proteins. 4. Highlights a node involved in cadherin adhesion that  
13 is downregulated upon Diaph2 depletion. B. Virions produced in Diaph2<sup>-ve</sup>Arp2/3<sup>-ve</sup> cells.  
14 Note that in 1. Arp2/3 components are predictably depleted compared to untreated cells,  
15 whilst in 2. the GTPase node and IQGAP1 remain unchanged.

16

17 **Figure 6. HIV infection and its influence on cortical F-Actin.**

18 A. From viral proteomics, we identified a common node of actin regulators associated with  
19 Arp2/3-dependent filopodia and lamellipodia. Through shRNA depletion or CRISPR-Cas9  
20 knockout, we generated clonal cell populations depleted of various actin regulators. B-C  
21 Lamellipodial regulators. B. Rac1<sup>-ve</sup> and C. WAVE2<sup>k/o</sup>. D. Cdc42<sup>k/o</sup> (filopodial regulator). E.  
22 IQGAP1<sup>-ve</sup>. A. Represents the untreated control. All cells were infected with HIV iGFP  
23 (green) and then counterstained with phalloidin Alexa-647 (white). All scale bars are at 5µm.  
24 Inset magnifications reveal HIV at the leading edge of filopodial structures. Note in Rac1<sup>-ve</sup>  
25 and WAVE2<sup>k/o</sup> images the extensive filopodial networks only present in HIV infected (green)  
26 cells (see Fig. S2 for formal quantification).

27

28 **Figure 7. HIV spread is dependent on Cdc42 and IQGAP1**

29 A. All cells are infected with pHIVNL43iGFP and normalised to 5% infection on day 3.  
30 After normalisation, cell supernatants are collected over a 24 hour period and GFP positive  
31 HIV particles are spinoculated onto 96-well glass plates coated with poly-L-lysine. Absolute  
32 viral particle counts are determined by high-resolution fluorescence microscopy per 4 fields  
33 of view. Herein the data is presented as a relative count [(virion count/virion count in  
34 WT control)\*100]. B. HIV infected cells as normalised in A. are then co-cultured at a ratio of  
35 1:5 with HIV-permissive TZMBI targets. C. Infected cells are co-cultured with primary CD4  
36 target T-cells at limiting dilutions. Dilution steps correspond to 5%, 1% and 0.2% infected  
37 cells in the donor population. Exposure to virus from infected cells is limited to 24 hours,  
38 after which an entry inhibitor BMS806 is added to prevent further viral spread. A-C. Data  
39 indicates the mean and standard deviation from 3 independent experiments. In C,  
40 primary recipient CD4 T cells were sourced from independent blood donors. D) The  
41 cumulative number of contacts between each infected donor cell and any uninfected target  
42 cells (TZM-bl) over 3 hours. E) same as D but only the first contact with each distinct target  
43 cell is counted. F) Representative example of a time-lapse series from D-E. Cells are  
44 infected with HIViGFP, allowing real-time visualization of Gag. G) At the virological  
45 synapse, donor-cell circularity was used to enumerate lack of membrane protrusions (ie. Lack  
46 of filopodia) in parallel with Gag polarization. In grey shading are the time points where GFP  
47 cytoplasmic transfer (ie. Viral fusion) is observed. \*  $p < 0.01$ , \*\* $p < 0.001$ , \*\*\* $p < 0.0001$ .

48

49 **Figure 8. Proposed model of spatio-temporal regulation of F-Actin during HIV egress.**

50 A. With probing and tethering activity corrupted by HIV buds, the F-actin structures at this

1 phase enable pre-synaptic events (cell contacts and initial adhesion). B. Following cell-cell  
2 engagement, the viral synapse matures. This leads to two important outcomes. Firstly, similar  
3 to that observed at the immunological synapse [72] Cdc42-F-Actin activity is altered and  
4 transitions from filopodial biogenesis to cell-cell adhesion required for HIV release (as  
5 observed when cells collapse filopodia just prior to HIV fusion). During this change we  
6 hypothesise IQGAP1 being directly involved through providing a scaffolding center needed  
7 temporally coordinate binding not only to HIV Gag, but also providing feedback to other  
8 binding partners including Cdc42 and TSG101. Whilst the observations herein and recently  
9 by others [41], initially supports this model, future work will be key in understanding the  
10 switching nature of IQGAP1 and how F-Actin and CDC42 influences its role in the final  
11 stages of viral abscission and transfer.

12

### 13 Supplementary Figure Legends

14

#### 15 **Figure S1. Filopodial network disruption as a result of formin and Arp2/3 depletion.**

16 Number of filopodia per cell were enumerated using live cell microscopy. In the left panel  
17 formins Diaph1, Diaph2 and FMNL1 are depleted using shRNA. Due to lack of detectable  
18 expression, other addition known formins were not tested. In the right panel, following  
19 depletion of Diaph2, cells were rescued with C/A Diaph2 or co-shRNA depleted (in addition  
20 to Diaph2 depletion) for the formins Diaph1, FMNL1 or the Arp2/3 complex. Note, only  
21 Arp2/3 + Diaph2 co-depletion decreases filopodial frequency. B. Filopodial lengths derived  
22 from the same cells observed in A. Note only Diaph2 depletion and Diaph2 & Arp2/3 co-  
23 depletion have significant impacts on filopodial lengths. Also note C/A Diaph2 can rescue  
24 filopodial lengths post Diaph2 depletion. Data represents pooled datasets from three  
25 independent experiments.\*\*\*p<0.0001.

26

#### 27 **Figure S2. Filopodial frequencies and lengths relative to HIV infection**

28 A. % Frequency of cells with filopodia. Infected (green) uninfected (grey). Each data  
29 point represents a single independent experiment B. Filopodial lengths in the presence of  
30 HIV infection. Accumulative filopodial lengths pooled from the 4 independent experiments  
31 outlined in A. \*p<0.01, \*\*p<0.001

32

#### 33 **Figure S3. Analysis of clonal populations for shRNA knockdown of targets.**

34 A-E Western blotting of cellular lysates using antigen specific antibodies to A. Rac1, B.  
35 IQGAP1, C. Arp2, D. Diaph2. In each case, GAPDH immunoblotting of the same transferred  
36 lysate is presented below each upper panel. F. Knockdown relative to untreated controls. G.  
37 Residual protein expression calculated by determining the band intensities using GeneTools  
38 software from Syngene followed by background correction and lane normalization of  
39 GAPDH. Remaining protein was then calculated by dividing the intensities of target bands by  
40 the lane normalization factor<sup>17</sup>. H. Metabolic activity (viability) of the main clonal cell lines  
41 used within this study. I. Relative Gag-iGFP expression within each clonal cell line. All cells  
42 were infected as outlined within quantitative cell to cell virus transfer assays. Cells were  
43 fixed and then mean fluorescence intensity quantified by flow cytometry. Expression of Gag-  
44 iGFP is then expressed as % relative to the WT cell line control. In H and I, data is  
45 representative of a minimum of three independent control experiments.

46 **Figure S4. Verification of CRISPR/Cas9 gene-editing by DNA sequencing.** U937 cells  
47 expressing Cas9 and a specific gRNA where clonally expanded, and clones were screened by  
48 genomic PCR amplification of the gRNA target site followed by DNA sequencing. Shown  
49 are representative examples for different gRNAs. In each case, the wildtype genome is shown  
50 above the mutated genome for comparison. The 20 bp region of the gRNA complementary to

1 the host wildtype genome (protospacer) is highlighted in orange, whereas the protospacer  
2 adjacent motif (PAM sequence) is indicated by a green box (NGG in lead strand or CCN in  
3 complementary strand). **A.** Wave2<sup>k/o</sup> cell clone with three point mutations and 1 bp deletion  
4 in positions 14-17 of the protospacer (red box). Single chromatogram peaks throughout the  
5 amplicon indicate homozygous mutant alleles. The 1b deletion leads to a frameshift from  
6 residue 74, resulting in >70% loss of native protein sequence and a premature stop codon at  
7 residue 127 of 498. **B.** Cdc42<sup>k/o</sup> cell clone with heterozygous mutations, including at least 1  
8 bp deletion per allele at positions 17-20 of the protospacer. Frameshift at these positions leads  
9 to >80% loss of native protein sequence.

10

11 Supplementary tables

12 **Table S-I. Statistical Summary for Unpaired two tail T-Test for HIV bud frequency**  
13 **relative to cortical F-Actin structures**

14

15 **Table S-II. Plasmid constructs generated and used in this study**

16

17 **Table S-III. shRNA sequences used in this study**

18

19 **Table S-IV. CRISPR gRNA used in this study**

20

21 **Table S-V: List of selected proteins detected in virion preparations from**  
22 **Diaph2<sup>+ve</sup>Arp<sup>+ve</sup> Diaph2<sup>-ve</sup>Arp<sup>+ve</sup> cells and Diaph2<sup>-ve</sup>Arp<sup>-ve</sup> cells.**

23

24 **Table S-VI: Fold change in the levels of cellular proteins detected in virion preparations**  
25 **from Diaph2<sup>-ve</sup>Arp<sup>+ve</sup> cells and Diaph2<sup>-ve</sup>Arp<sup>-ve</sup> cells relative to Diaph2<sup>+ve</sup>Arp<sup>+ve</sup> cells.**

26

27 Supplementary movie files

28

29 **Movie 1. FIB-SEM imaging reveals extensive short filopodial networks in the absence of**  
30 **Diaph2.**

31 Rotation of 3 dimensional rendering from accumulative *FIB-SEM* datasets derived from cells  
32 depleted of Diaph2. At the conclusion of the rotation, filopodial networks are highlighted  
33 individually in colour. Note the extensive curvature and sub-populations of short filopodia  
34 that have branching (i.e. Consistent with the action of Arp2/3).

35

36 **Movie 2. FIB-SEM imaging reveals extensive lamellipodial networks in cells with co-**  
37 **depleted Diaph2 and Arp2/3.**

38 Rotation of 3 dimensional rendering from accumulative *FIB-SEM* datasets derived from cells  
39 shRNA co-depleted of Diaph2 and Arp2/3. At the conclusion of the rotation, lamellipodial  
40 networks are highlighted individually in colour. For this dataset, we have used a HIV infected  
41 sample to highlight the enrichment of virions to the ridges of lamellipodial network (see  
42 timestamp 14s and the ridge of the green highlighted). Of note, HIV infection does not  
43 influence cortical F-Actin in this cellular clone and this image is representative of HIV  
44 negative and positive samples.

45

46 **Movie 3. Diaph<sup>C/A</sup> filopodia are straight, dynamic filopodia that exclude HIV.**

1 Live imaging of HIViGFP<sup>+ve</sup> (green) Diaph<sup>C/A</sup>-mCherry (red) cells presented as an overlay  
2 with Differential Interference Contrast imaging to capture filopodial networks. Frame rate is  
3 presented in real-time at 0.841 frames per second.

4

5 **Movie 4. Diaph<sup>C/A</sup> filopodia cannot be inhibited by HIV curvature mutants**

6 Live imaging of Diaph<sup>-ve</sup> HIViGFP<sup>CA99A+ve</sup>(green) cells (left panel) and Diaph<sup>C/A</sup>-mCherry  
7 (red), HIV<sup>CA99A+ve</sup> (green) cells presented as an overlay with Differential Interference  
8 Contrast imaging to capture filopodial networks. Frame rate is presented in real-time as in the  
9 figure legend to Movie 3. Note, in the left panel, the complete lack of any filopodial network,  
10 whereas in the right panel Diaph<sup>C/A</sup> can readily induce filopodia in the present of  
11 HIV<sup>CA99A+ve</sup>.

12

13 **Movie 5. HIV augmented filopodia in WAVE2<sup>k/o</sup> cells tether and then retract upon cell-**  
14 **cell conjugation.** Tethering capacity of augmented filopodia is presented. Herein a thick  
15 filopodial structure at approximately 40µm in length is presented and targets cell that  
16 subsequently undergoes cell division. Note, that all filopodial activity ceases, once the  
17 infected donor cell has conjugated between the two recipient daughter cells. Movie is a time  
18 lapse speedup with each frame at 30 seconds intervals.

19

20 **Movie 6. Filopodial networks in HIV infected WAVE2<sup>k/o</sup> cells collapse prior to cell-cell**  
21 **HIV transfer.** Whilst extensive filopodial activity proceeds upon initial cell-cell contact, at  
22 the movie time point 31s, all filopodial activity ceases with retraction of all filopodia.  
23 Immediately following filopodial retraction, GFP delivery/release is firstly observed,  
24 followed shortly after by cell-cell fusion and syncytia formation. Movie is a time lapse  
25 speedup with each frame at 30 seconds intervals.

26



## 1 References

2  
3  
4  
5  
6  
7  
8  
9  
10  
11  
12  
13  
14  
15  
16  
17  
18  
19  
20  
21  
22  
23  
24  
25  
26  
27  
28  
29  
30  
31  
32  
33  
34  
35  
36  
37  
38  
39  
40  
41  
42  
43  
44  
45  
46  
47  
48  
49

1. Robinson, R.C.; Turbedsky, K.; Kaiser, D.A.; Marchand, J.B.; Higgs, H.N.; Choe, S.; Pollard, T.D. Crystal structure of Arp2/3 complex. *Science (New York, N.Y.)* **2001**, *294*, 1679-1684, doi:10.1126/science.1066333.
2. Nobes, C.D.; Hall, A. Rho, rac, and cdc42 GTPases regulate the assembly of multimolecular focal complexes associated with actin stress fibers, lamellipodia, and filopodia. *Cell* **1995**, *81*, 53-62, doi:10.1016/0092-8674(95)90370-4.
3. Phillips, D.M.; Bourinbaier, A.S. Mechanism of HIV spread from lymphocytes to epithelia. *Virology* **1992**, *186*, 261-273, doi:10.1016/0042-6822(92)90080-9.
4. Jolly, C.; Kashefi, K.; Hollinshead, M.; Sattentau, Q.J. HIV-1 cell to cell transfer across an Env-induced, actin-dependent synapse. *The Journal of experimental medicine* **2004**, *199*, 283-293, doi:10.1084/jem.20030648.
5. Sundquist, W.I.; Krausslich, H.G. HIV-1 assembly, budding, and maturation. *Cold Spring Harbor perspectives in medicine* **2012**, *2*, a006924, doi:10.1101/cshperspect.a006924.
6. Garrus, J.E.; von Schwedler, U.K.; Pornillos, O.W.; Morham, S.G.; Zavitz, K.H.; Wang, H.E.; Wettstein, D.A.; Stray, K.M.; Cote, M.; Rich, R.L., et al. Tsg101 and the vacuolar protein sorting pathway are essential for HIV-1 budding. *Cell* **2001**, *107*, 55-65, doi:10.1016/s0092-8674(01)00506-2.
7. Gladnikoff, M.; Shimoni, E.; Gov, N.S.; Rousso, I. Retroviral assembly and budding occur through an actin-driven mechanism. *Biophysical journal* **2009**, *97*, 2419-2428, doi:10.1016/j.bpj.2009.08.016.
8. Carlson, L.A.; de Marco, A.; Oberwinkler, H.; Habermann, A.; Briggs, J.A.; Krausslich, H.G.; Grunewald, K. Cryo electron tomography of native HIV-1 budding sites. *PLoS pathogens* **2010**, *6*, e1001173, doi:10.1371/journal.ppat.1001173.
9. Aggarwal, A.; Iemma, T.L.; Shih, I.; Newsome, T.P.; McAllery, S.; Cunningham, A.L.; Turville, S.G. Mobilization of HIV spread by diaphanous 2 dependent filopodia in infected dendritic cells. *PLoS pathogens* **2012**, *8*, e1002762, doi:10.1371/journal.ppat.1002762.
10. Ladinsky, M.S.; Kieffer, C.; Olson, G.; Deruaz, M.; Vrbanac, V.; Tager, A.M.; Kwon, D.S.; Bjorkman, P.J. Electron tomography of HIV-1 infection in gut-associated lymphoid tissue. *PLoS pathogens* **2014**, *10*, e1003899, doi:10.1371/journal.ppat.1003899.
11. Lu, J.; Qu, Y.; Liu, Y.; Jambusaria, R.; Han, Z.; Ruthel, G.; Freedman, B.D.; Harty, R.N. Host IQGAP1 and Ebola virus VP40 interactions facilitate virus-like particle egress. *Journal of virology* **2013**, *87*, 7777-7780, doi:10.1128/jvi.00470-13.
12. Mattila, P.K.; Lappalainen, P. Filopodia: molecular architecture and cellular functions. *Nature reviews. Molecular cell biology* **2008**, *9*, 446-454, doi:10.1038/nrm2406.
13. Wu, C.; Asokan, S.B.; Berginski, M.E.; Haynes, E.M.; Sharpless, N.E.; Griffith, J.D.; Gomez, S.M.; Bear, J.E. Arp2/3 is critical for lamellipodia and response to extracellular matrix cues but is dispensable for chemotaxis. *Cell* **2012**, *148*, 973-987, doi:10.1016/j.cell.2011.12.034.
14. Suraneni, P.; Rubinstein, B.; Unruh, J.R.; Durnin, M.; Hanein, D.; Li, R. The Arp2/3 complex is required for lamellipodia extension and directional fibroblast cell migration. *The Journal of cell biology* **2012**, *197*, 239-251, doi:10.1083/jcb.201112113.

- 1 15. Young, L.E.; Heimsath, E.G.; Higgs, H.N. Cell type-dependent mechanisms for  
2 formin-mediated assembly of filopodia. *Molecular biology of the cell* **2015**, *26*, 4646-  
3 4659, doi:10.1091/mbc.E15-09-0626.
- 4 16. Eugenin, E.A.; Gaskill, P.J.; Berman, J.W. Tunneling nanotubes (TNT) are induced  
5 by HIV-infection of macrophages: a potential mechanism for intercellular HIV  
6 trafficking. *Cellular immunology* **2009**, *254*, 142-148,  
7 doi:10.1016/j.cellimm.2008.08.005.
- 8 17. Bourinbaïar, A.S.; Phillips, D.M. Transmission of human immunodeficiency virus  
9 from monocytes to epithelia. *Journal of acquired immune deficiency syndromes* **1991**,  
10 *4*, 56-63.
- 11 18. Pearce-Pratt, R.; Malamud, D.; Phillips, D.M. Role of the cytoskeleton in cell-to-cell  
12 transmission of human immunodeficiency virus. *Journal of virology* **1994**, *68*, 2898-  
13 2905.
- 14 19. Higgs, H.N.; Peterson, K.J. Phylogenetic analysis of the formin homology 2 domain.  
15 *Molecular biology of the cell* **2005**, *16*, 1-13, doi:10.1091/mbc.e04-07-0565.
- 16 20. Narayan, K.; Danielson, C.M.; Lagarec, K.; Lowekamp, B.C.; Coffman, P.; Laquerre,  
17 A.; Phaneuf, M.W.; Hope, T.J.; Subramaniam, S. Multi-resolution correlative focused  
18 ion beam scanning electron microscopy: applications to cell biology. *Journal of*  
19 *structural biology* **2014**, *185*, 278-284, doi:10.1016/j.jsb.2013.11.008.
- 20 21. Narayan, K.; Subramaniam, S. Focused ion beams in biology. *Nature methods* **2015**,  
21 *12*, 1021-1031, doi:10.1038/nmeth.3623.
- 22 22. Felts, R.L.; Narayan, K.; Estes, J.D.; Shi, D.; Trubey, C.M.; Fu, J.; Hartnell, L.M.;  
23 Ruthel, G.T.; Schneider, D.K.; Nagashima, K., et al. 3D visualization of HIV transfer  
24 at the virological synapse between dendritic cells and T cells. *Proceedings of the*  
25 *National Academy of Sciences of the United States of America* **2010**, *107*, 13336-  
26 13341, doi:10.1073/pnas.1003040107.
- 27 23. Alberts, A.S. Identification of a carboxyl-terminal diaphanous-related formin  
28 homology protein autoregulatory domain. *The Journal of biological chemistry* **2001**,  
29 *276*, 2824-2830, doi:10.1074/jbc.M006205200.
- 30 24. Lammers, M.; Rose, R.; Scrima, A.; Wittinghofer, A. The regulation of mDial by  
31 autoinhibition and its release by Rho\*GTP. *The EMBO journal* **2005**, *24*, 4176-4187,  
32 doi:10.1038/sj.emboj.7600879.
- 33 25. Block, J.; Breitsprecher, D.; Kuhn, S.; Winterhoff, M.; Kage, F.; Geffers, R.; Duwe,  
34 P.; Rohn, J.L.; Baum, B.; Brakebusch, C., et al. FMNL2 drives actin-based protrusion  
35 and migration downstream of Cdc42. *Current biology : CB* **2012**, *22*, 1005-1012,  
36 doi:10.1016/j.cub.2012.03.064.
- 37 26. Liu, B.; Dai, R.; Tian, C.J.; Dawson, L.; Gorelick, R.; Yu, X.F. Interaction of the  
38 human immunodeficiency virus type 1 nucleocapsid with actin. *Journal of virology*  
39 **1999**, *73*, 2901-2908.
- 40 27. Zhao, H.; Datta, S.A.K.; Kim, S.H.; To, S.C.; Chaturvedi, S.K.; Rein, A.; Schuck, P.  
41 Nucleic acid-induced dimerization of HIV-1 Gag protein. *The Journal of biological*  
42 *chemistry* **2019**, *294*, 16480-16493, doi:10.1074/jbc.RA119.010580.
- 43 28. Crist, R.M.; Datta, S.A.; Stephen, A.G.; Soheilian, F.; Mirro, J.; Fisher, R.J.;  
44 Nagashima, K.; Rein, A. Assembly properties of human immunodeficiency virus type  
45 1 Gag-leucine zipper chimeras: implications for retrovirus assembly. *Journal of*  
46 *virology* **2009**, *83*, 2216-2225, doi:10.1128/jvi.02031-08.
- 47 29. von Schwedler, U.K.; Stray, K.M.; Garrus, J.E.; Sundquist, W.I. Functional surfaces  
48 of the human immunodeficiency virus type 1 capsid protein. *Journal of virology*  
49 **2003**, *77*, 5439-5450, doi:10.1128/jvi.77.9.5439-5450.2003.

- 1 30. Hogue, I.B.; Grover, J.R.; Soheilian, F.; Nagashima, K.; Ono, A. Gag induces the  
2 coalescence of clustered lipid rafts and tetraspanin-enriched microdomains at HIV-1  
3 assembly sites on the plasma membrane. *Journal of virology* **2011**, *85*, 9749-9766,  
4 doi:10.1128/jvi.00743-11.
- 5 31. Ott, D.E.; Coren, L.V.; Johnson, D.G.; Kane, B.P.; Sowder, R.C., 2nd; Kim, Y.D.;  
6 Fisher, R.J.; Zhou, X.Z.; Lu, K.P.; Henderson, L.E. Actin-binding cellular proteins  
7 inside human immunodeficiency virus type 1. *Virology* **2000**, *266*, 42-51,  
8 doi:10.1006/viro.1999.0075.
- 9 32. Chertova, E.; Chertov, O.; Coren, L.V.; Roser, J.D.; Trubey, C.M.; Bess, J.W., Jr.;  
10 Sowder, R.C., 2nd; Barsov, E.; Hood, B.L.; Fisher, R.J., et al. Proteomic and  
11 biochemical analysis of purified human immunodeficiency virus type 1 produced  
12 from infected monocyte-derived macrophages. *Journal of virology* **2006**, *80*, 9039-  
13 9052, doi:10.1128/jvi.01013-06.
- 14 33. Stauffer, S.; Rahman, S.A.; de Marco, A.; Carlson, L.A.; Glass, B.; Oberwinkler, H.;  
15 Herold, N.; Briggs, J.A.; Muller, B.; Grunewald, K., et al. The nucleocapsid domain  
16 of Gag is dispensable for actin incorporation into HIV-1 and for association of viral  
17 budding sites with cortical F-actin. *Journal of virology* **2014**, *88*, 7893-7903,  
18 doi:10.1128/jvi.00428-14.
- 19 34. Nelson, W.J.; Drees, F.; Yamada, S. Interaction of cadherin with the actin  
20 cytoskeleton. *Novartis Foundation symposium* **2005**, *269*, 159-168; discussion 168-  
21 177, 223-130.
- 22 35. Fukata, M.; Nakagawa, M.; Itoh, N.; Kawajiri, A.; Yamaga, M.; Kuroda, S.;  
23 Kaibuchi, K. Involvement of IQGAP1, an effector of Rac1 and Cdc42 GTPases, in  
24 cell-cell dissociation during cell scattering. *Molecular and cellular biology* **2001**, *21*,  
25 2165-2183, doi:10.1128/mcb.21.6.2165-2183.2001.
- 26 36. Swart-Mataraza, J.M.; Li, Z.; Sacks, D.B. IQGAP1 is a component of Cdc42  
27 signaling to the cytoskeleton. *The Journal of biological chemistry* **2002**, *277*, 24753-  
28 24763, doi:10.1074/jbc.M111165200.
- 29 37. Hart, T.; Chandrashekhar, M.; Aregger, M.; Steinhart, Z.; Brown, K.R.; MacLeod, G.;  
30 Mis, M.; Zimmermann, M.; Fradet-Turcotte, A.; Sun, S., et al. High-Resolution  
31 CRISPR Screens Reveal Fitness Genes and Genotype-Specific Cancer Liabilities.  
32 *Cell* **2015**, *163*, 1515-1526, doi:10.1016/j.cell.2015.11.015.
- 33 38. Yan, C.; Martinez-Quiles, N.; Eden, S.; Shibata, T.; Takeshima, F.; Shinkura, R.;  
34 Fujiwara, Y.; Bronson, R.; Snapper, S.B.; Kirschner, M.W., et al. WAVE2 deficiency  
35 reveals distinct roles in embryogenesis and Rac-mediated actin-based motility. *The*  
36 *EMBO journal* **2003**, *22*, 3602-3612, doi:10.1093/emboj/cdg350.
- 37 39. Daste, F.; Walrant, A.; Holst, M.R.; Gadsby, J.R.; Mason, J.; Lee, J.E.; Brook, D.;  
38 Mettlen, M.; Larsson, E.; Lee, S.F., et al. Control of actin polymerization via the  
39 coincidence of phosphoinositides and high membrane curvature. *The Journal of cell*  
40 *biology* **2017**, *216*, 3745-3765, doi:10.1083/jcb.201704061.
- 41 40. Gallop, J.L.; Walrant, A.; Cantley, L.C.; Kirschner, M.W. Phosphoinositides and  
42 membrane curvature switch the mode of actin polymerization via selective  
43 recruitment of toco-1 and Snx9. *Proceedings of the National Academy of Sciences of*  
44 *the United States of America* **2013**, *110*, 7193-7198, doi:10.1073/pnas.1305286110.
- 45 41. Sabo, Y.; de Los Santos, K.; Goff, S.P. IQGAP1 Negatively Regulates HIV-1 Gag  
46 Trafficking and Virion Production. *Cell Rep* **2020**, *30*, 4065-4081 e4064,  
47 doi:10.1016/j.celrep.2020.03.002.
- 48 42. Brandt, D.T.; Grosse, R. Get to grips: steering local actin dynamics with IQGAPs.  
49 *EMBO reports* **2007**, *8*, 1019-1023, doi:10.1038/sj.embor.7401089.

- 1 43. Fukata, M.; Kuroda, S.; Fujii, K.; Nakamura, T.; Shoji, I.; Matsuura, Y.; Okawa, K.;  
2 Iwamatsu, A.; Kikuchi, A.; Kaibuchi, K. Regulation of cross-linking of actin filament  
3 by IQGAP1, a target for Cdc42. *The Journal of biological chemistry* **1997**, *272*,  
4 29579-29583, doi:10.1074/jbc.272.47.29579.
- 5 44. Bendjennat, M.; Saffarian, S. The Race against Protease Activation Defines the Role  
6 of ESCRTs in HIV Budding. *PLoS pathogens* **2016**, *12*, e1005657,  
7 doi:10.1371/journal.ppat.1005657.
- 8 45. Damsky, C.H.; Sheffield, J.B.; Tuszynski, G.P.; Warren, L. Is there a role for actin in  
9 virus budding? *The Journal of cell biology* **1977**, *75*, 593-605,  
10 doi:10.1083/jcb.75.2.593.
- 11 46. Jouvenet, N.; Windsor, M.; Rietdorf, J.; Hawes, P.; Monaghan, P.; Way, M.;  
12 Wileman, T. African swine fever virus induces filopodia-like projections at the  
13 plasma membrane. *Cellular microbiology* **2006**, *8*, 1803-1811, doi:10.1111/j.1462-  
14 5822.2006.00750.x.
- 15 47. Kolesnikova, L.; Bohil, A.B.; Cheney, R.E.; Becker, S. Budding of Marburgvirus is  
16 associated with filopodia. *Cellular microbiology* **2007**, *9*, 939-951,  
17 doi:10.1111/j.1462-5822.2006.00842.x.
- 18 48. Kolesnikova, L.; Heck, S.; Matrosovich, T.; Klenk, H.D.; Becker, S.; Matrosovich,  
19 M. Influenza virus budding from the tips of cellular microvilli in differentiated human  
20 airway epithelial cells. *The Journal of general virology* **2013**, *94*, 971-976,  
21 doi:10.1099/vir.0.049239-0.
- 22 49. Carpenter, J.E.; Hutchinson, J.A.; Jackson, W.; Grose, C. Egress of light particles  
23 among filopodia on the surface of Varicella-Zoster virus-infected cells. *Journal of*  
24 *virology* **2008**, *82*, 2821-2835, doi:10.1128/jvi.01821-07.
- 25 50. Chang, K.; Baginski, J.; Hassan, S.F.; Volin, M.; Shukla, D.; Tiwari, V. Filopodia and  
26 Viruses: An Analysis of Membrane Processes in Entry Mechanisms. *Frontiers in*  
27 *microbiology* **2016**, *7*, 300, doi:10.3389/fmicb.2016.00300.
- 28 51. Lemichez, E.; Aktories, K. Hijacking of Rho GTPases during bacterial infection.  
29 *Experimental cell research* **2013**, *319*, 2329-2336, doi:10.1016/j.yexcr.2013.04.021.
- 30 52. Van den Broeke, C.; Jacob, T.; Favoreel, H.W. Rho'ing in and out of cells: viral  
31 interactions with Rho GTPase signaling. *Small GTPases* **2014**, *5*, e28318,  
32 doi:10.4161/sgtp.28318.
- 33 53. Gouin, E.; Welch, M.D.; Cossart, P. Actin-based motility of intracellular pathogens.  
34 *Current opinion in microbiology* **2005**, *8*, 35-45, doi:10.1016/j.mib.2004.12.013.
- 35 54. Small, J.V. Pushing with actin: from cells to pathogens. *Biochemical Society*  
36 *transactions* **2015**, *43*, 84-91, doi:10.1042/bst20140184.
- 37 55. Welch, M.D.; Way, M. Arp2/3-mediated actin-based motility: a tail of pathogen  
38 abuse. *Cell host & microbe* **2013**, *14*, 242-255, doi:10.1016/j.chom.2013.08.011.
- 39 56. Kim, H.; White, C.D.; Sacks, D.B. IQGAP1 in microbial pathogenesis: Targeting the  
40 actin cytoskeleton. *FEBS letters* **2011**, *585*, 723-729,  
41 doi:10.1016/j.febslet.2011.01.041.
- 42 57. Leung, J.; Yueh, A.; Appah, F.S., Jr.; Yuan, B.; de los Santos, K.; Goff, S.P.  
43 Interaction of Moloney murine leukemia virus matrix protein with IQGAP. *The*  
44 *EMBO journal* **2006**, *25*, 2155-2166, doi:10.1038/sj.emboj.7601097.
- 45 58. Gladue, D.P.; Holinka, L.G.; Fernandez-Sainz, I.J.; Prarat, M.V.; O'Donnell, V.;  
46 Vepkhvadze, N.G.; Lu, Z.; Risatti, G.R.; Borca, M.V. Interaction between Core  
47 protein of classical swine fever virus with cellular IQGAP1 protein appears essential  
48 for virulence in swine. *Virology* **2011**, *412*, 68-74, doi:10.1016/j.virol.2010.12.060.
- 49 59. Dolnik, O.; Kolesnikova, L.; Welsch, S.; Strecker, T.; Schudt, G.; Becker, S.  
50 Interaction with Tsg101 is necessary for the efficient transport and release of



- 1 nucleocapsids in marburg virus-infected cells. *PLoS pathogens* **2014**, *10*, e1004463,  
2 doi:10.1371/journal.ppat.1004463.
- 3 60. Dolnik, O.; Stevermann, L.; Kolesnikova, L.; Becker, S. Marburg virus inclusions: A  
4 virus-induced microcompartment and interface to multivesicular bodies and the late  
5 endosomal compartment. *European journal of cell biology* **2015**, *94*, 323-331,  
6 doi:10.1016/j.ejcb.2015.05.006.
- 7 61. Mehedi, M.; Collins, P.L.; Buchholz, U.J. A novel host factor for human respiratory  
8 syncytial virus. *Communicative & integrative biology* **2017**, *10*, e1319025,  
9 doi:10.1080/19420889.2017.1319025.
- 10 62. Mehedi, M.; McCarty, T.; Martin, S.E.; Le Nouen, C.; Buehler, E.; Chen, Y.C.;  
11 Smelkinson, M.; Ganesan, S.; Fischer, E.R.; Brock, L.G., et al. Actin-Related Protein  
12 2 (ARP2) and Virus-Induced Filopodia Facilitate Human Respiratory Syncytial Virus  
13 Spread. *PLoS pathogens* **2016**, *12*, e1006062, doi:10.1371/journal.ppat.1006062.
- 14 63. Martinez, M.G.; Kielian, M. Intercellular Extensions Are Induced by the Alphavirus  
15 Structural Proteins and Mediate Virus Transmission. *PLoS pathogens* **2016**, *12*,  
16 e1006061, doi:10.1371/journal.ppat.1006061.
- 17 64. Sherer, N.M.; Lehmann, M.J.; Jimenez-Soto, L.F.; Horensavitz, C.; Pypaert, M.;  
18 Mothes, W. Retroviruses can establish filopodial bridges for efficient cell-to-cell  
19 transmission. *Nature cell biology* **2007**, *9*, 310-315, doi:10.1038/ncb1544.
- 20 65. Cifuentes-Munoz, N.; Dutch, R.E.; Cattaneo, R. Direct cell-to-cell transmission of  
21 respiratory viruses: The fast lanes. *PLoS pathogens* **2018**, *14*, e1007015,  
22 doi:10.1371/journal.ppat.1007015.
- 23 66. Ziv, N.E.; Smith, S.J. Evidence for a role of dendritic filopodia in synaptogenesis and  
24 spine formation. *Neuron* **1996**, *17*, 91-102, doi:10.1016/s0896-6273(00)80283-4.
- 25 67. Niell, C.M.; Meyer, M.P.; Smith, S.J. In vivo imaging of synapse formation on a  
26 growing dendritic arbor. *Nature neuroscience* **2004**, *7*, 254-260, doi:10.1038/nn1191.
- 27 68. Vasioukhin, V.; Bauer, C.; Yin, M.; Fuchs, E. Directed actin polymerization is the  
28 driving force for epithelial cell-cell adhesion. *Cell* **2000**, *100*, 209-219,  
29 doi:10.1016/s0092-8674(00)81559-7.
- 30 69. Menna, E.; Fossati, G.; Scita, G.; Matteoli, M. From filopodia to synapses: the role of  
31 actin-capping and anti-capping proteins. *The European journal of neuroscience* **2011**,  
32 *34*, 1655-1662, doi:10.1111/j.1460-9568.2011.07897.x.
- 33 70. Mothes, W.; Sherer, N.M.; Jin, J.; Zhong, P. Virus cell-to-cell transmission. *Journal*  
34 *of virology* **2010**, *84*, 8360-8368, doi:10.1128/jvi.00443-10.
- 35 71. Meijering, E.; Dzyubachyk, O.; Smal, I. Methods for cell and particle tracking.  
36 *Methods Enzymol* **2012**, *504*, 183-200, doi:10.1016/B978-0-12-391857-4.00009-4.
- 37 72. Chemin, K.; Bohineust, A.; Dogniaux, S.; Turret, M.; Guegan, S.; Miro, F.; Hivroz,  
38 C. Cytokine secretion by CD4+ T cells at the immunological synapse requires Cdc42-  
39 dependent local actin remodeling but not microtubule organizing center polarity.  
40 *Journal of immunology (Baltimore, Md. : 1950)* **2012**, *189*, 2159-2168,  
41 doi:10.4049/jimmunol.1200156.
- 42

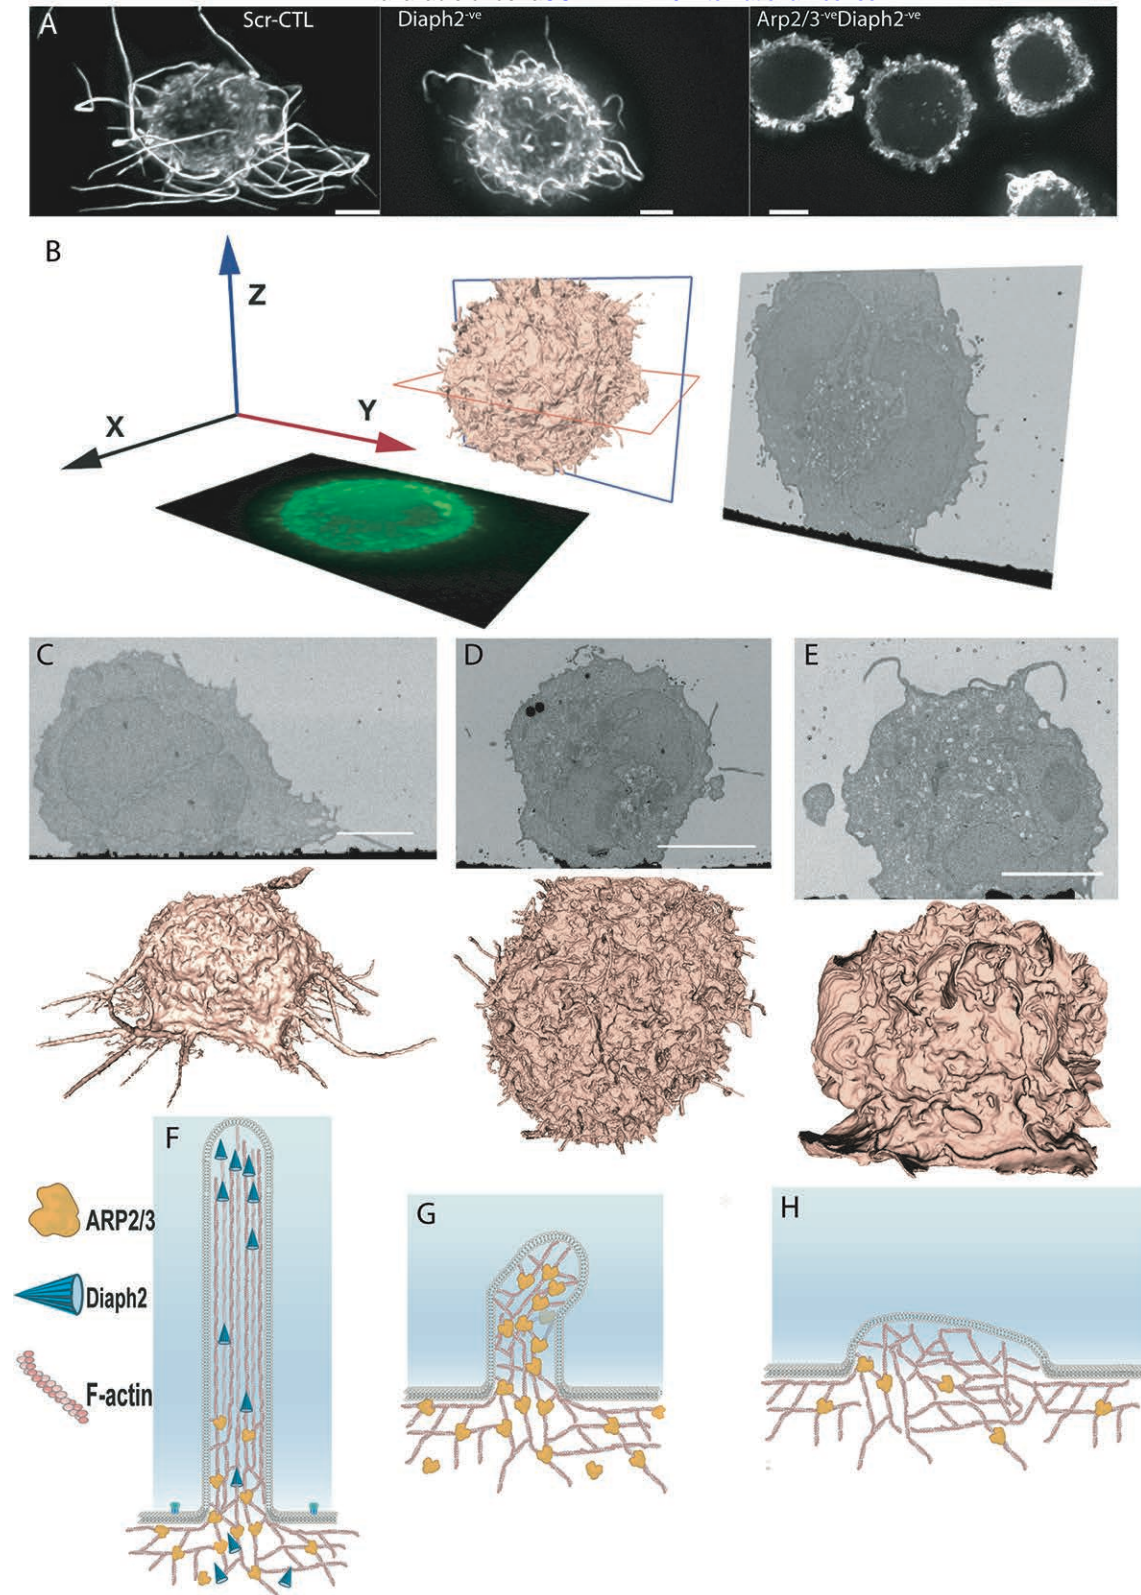

Figure 1.



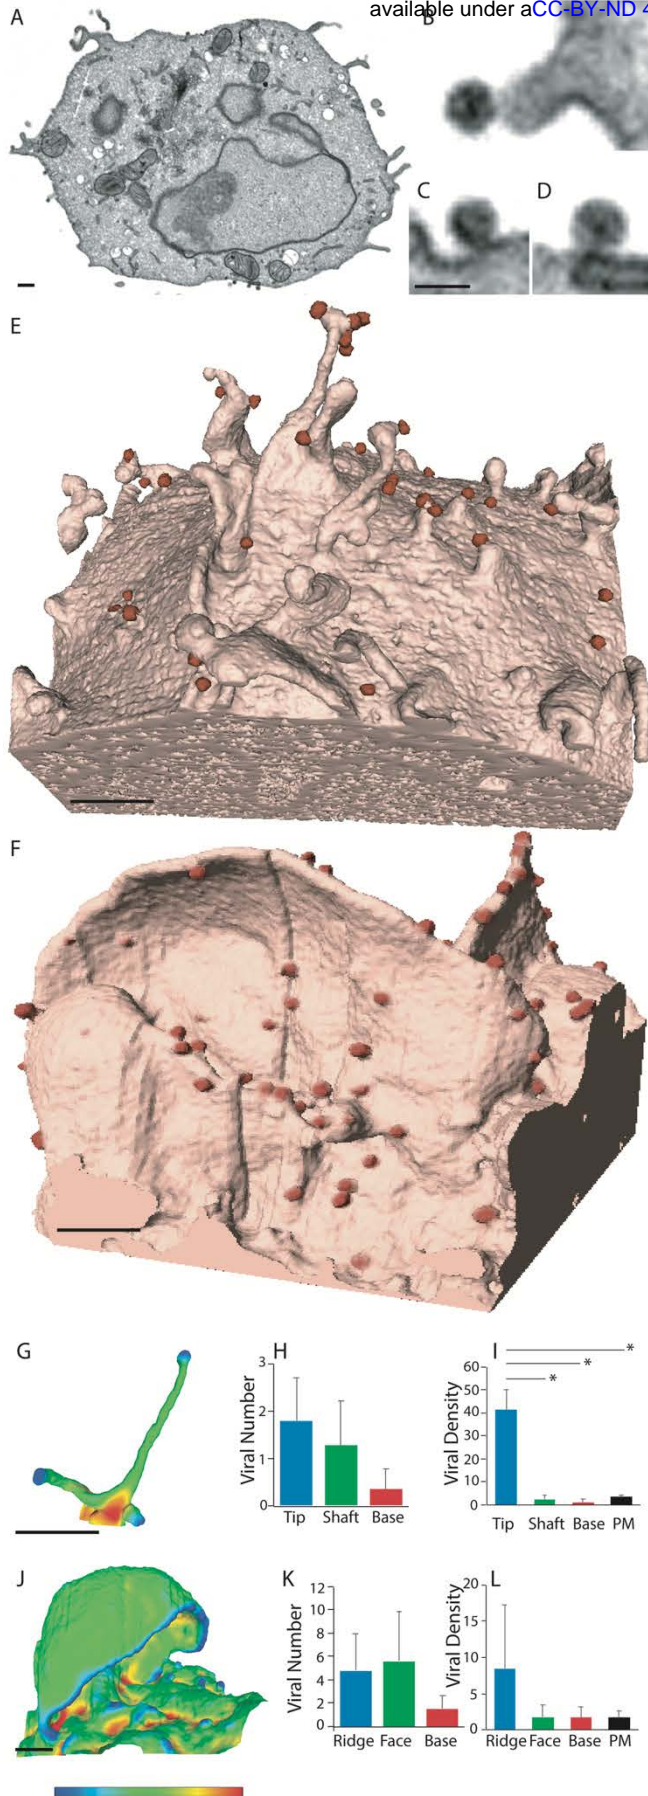

Figure 2.

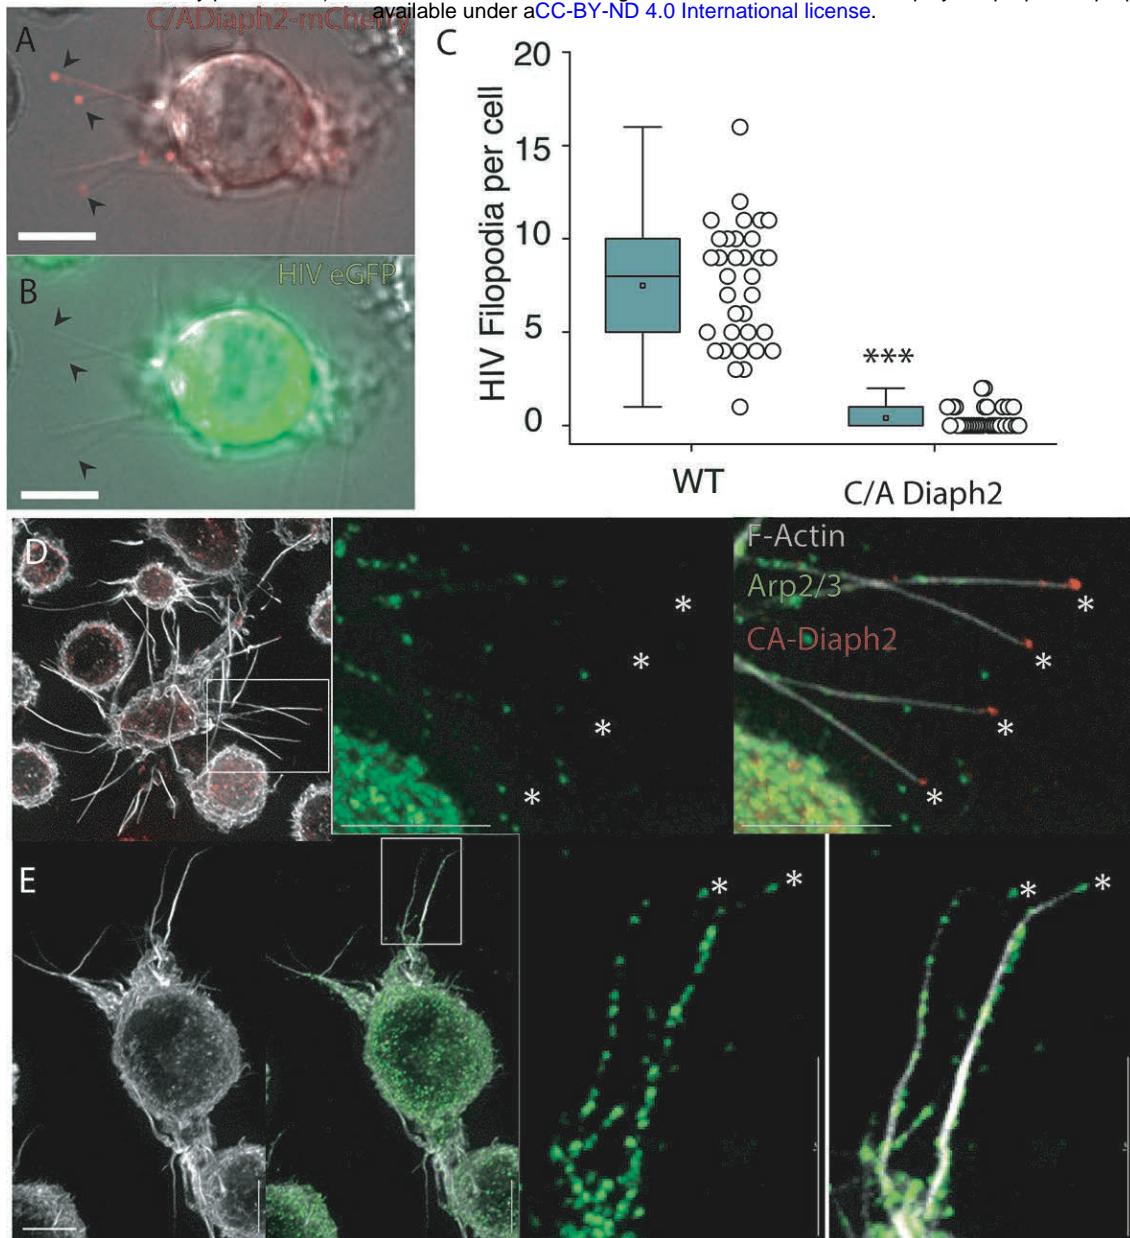

Figure 3.

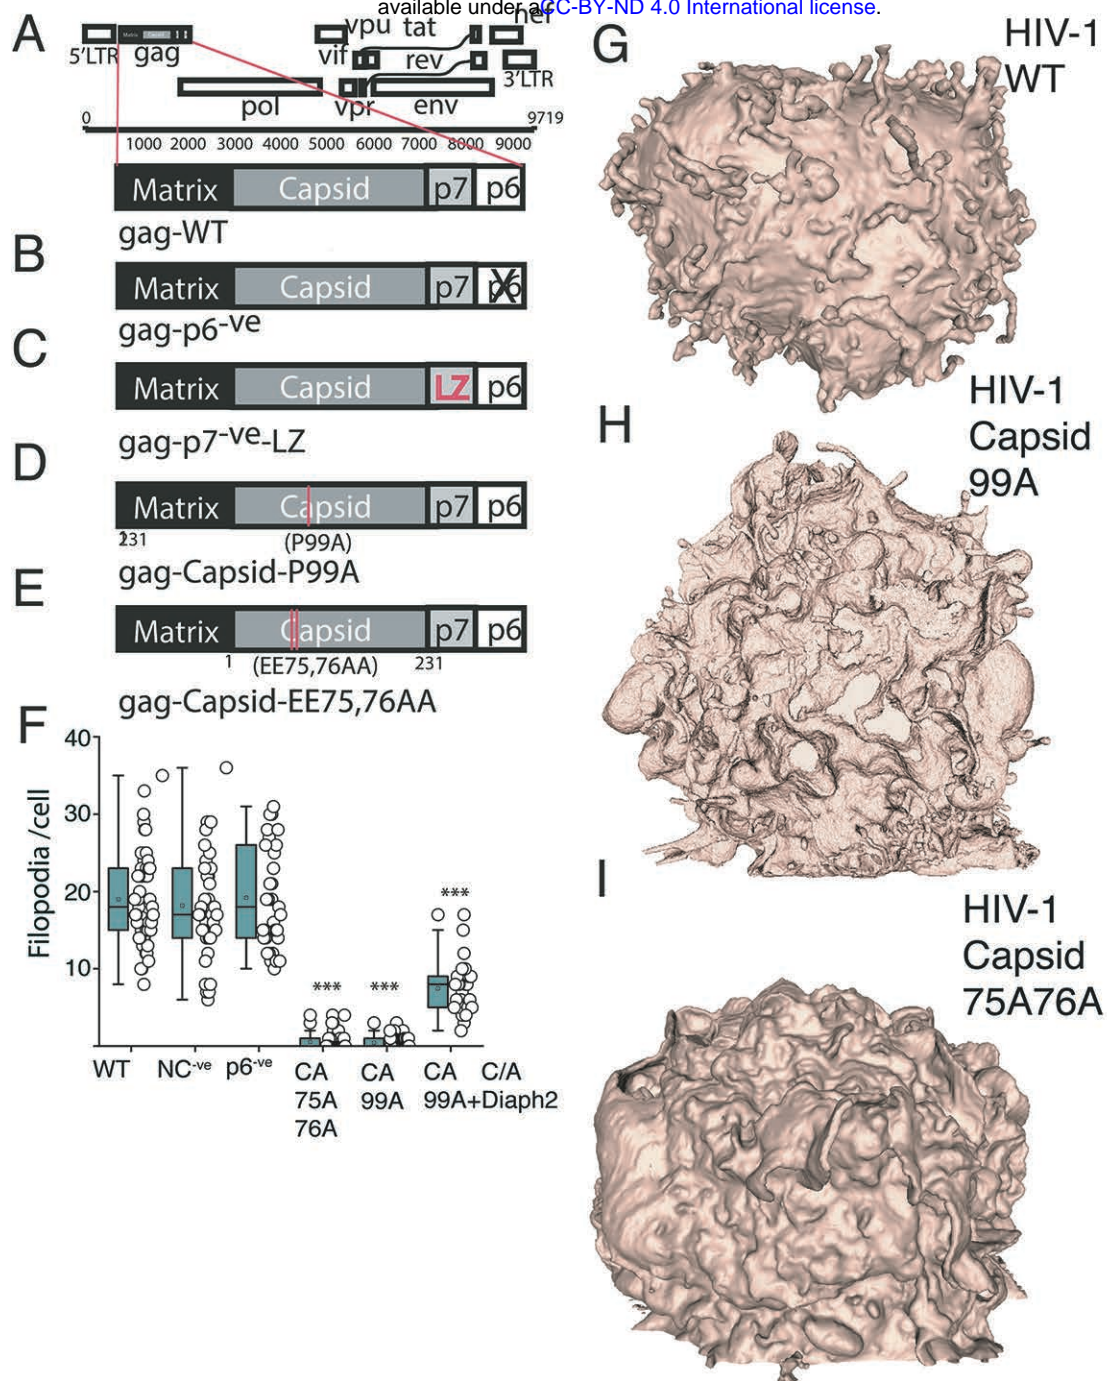

Figure 4.



### A Diaph2-ve

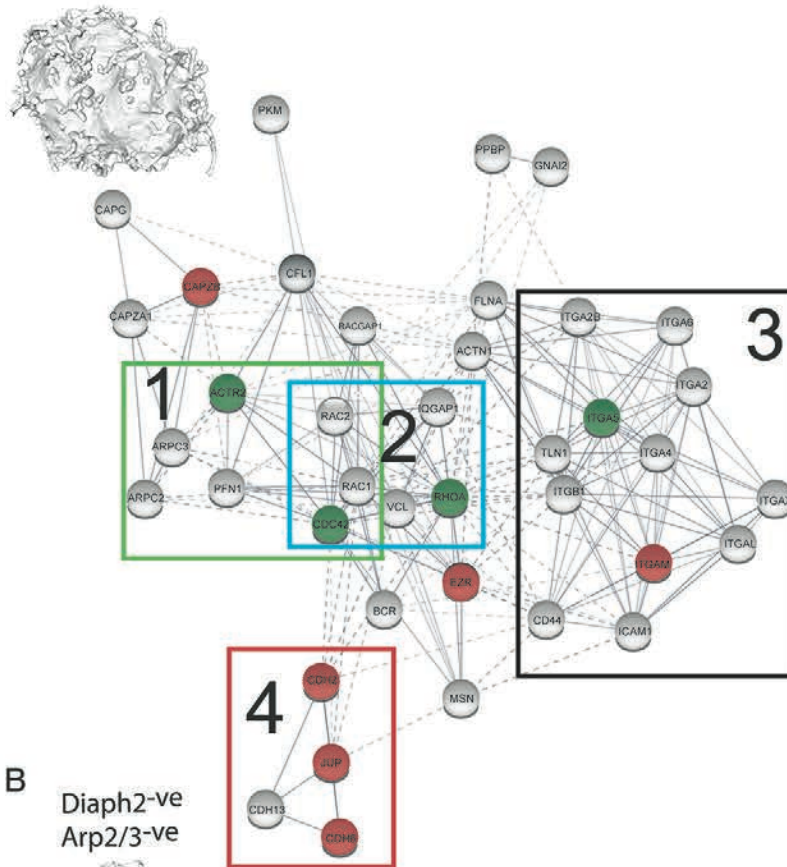

### B Diaph2-ve Arp2/3-ve

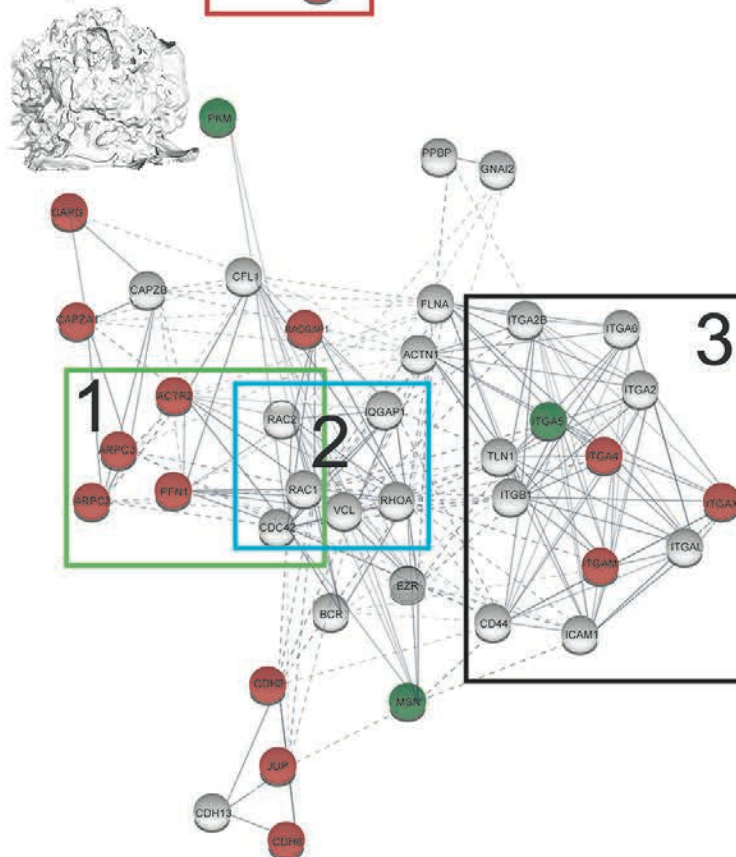

Figure 5.

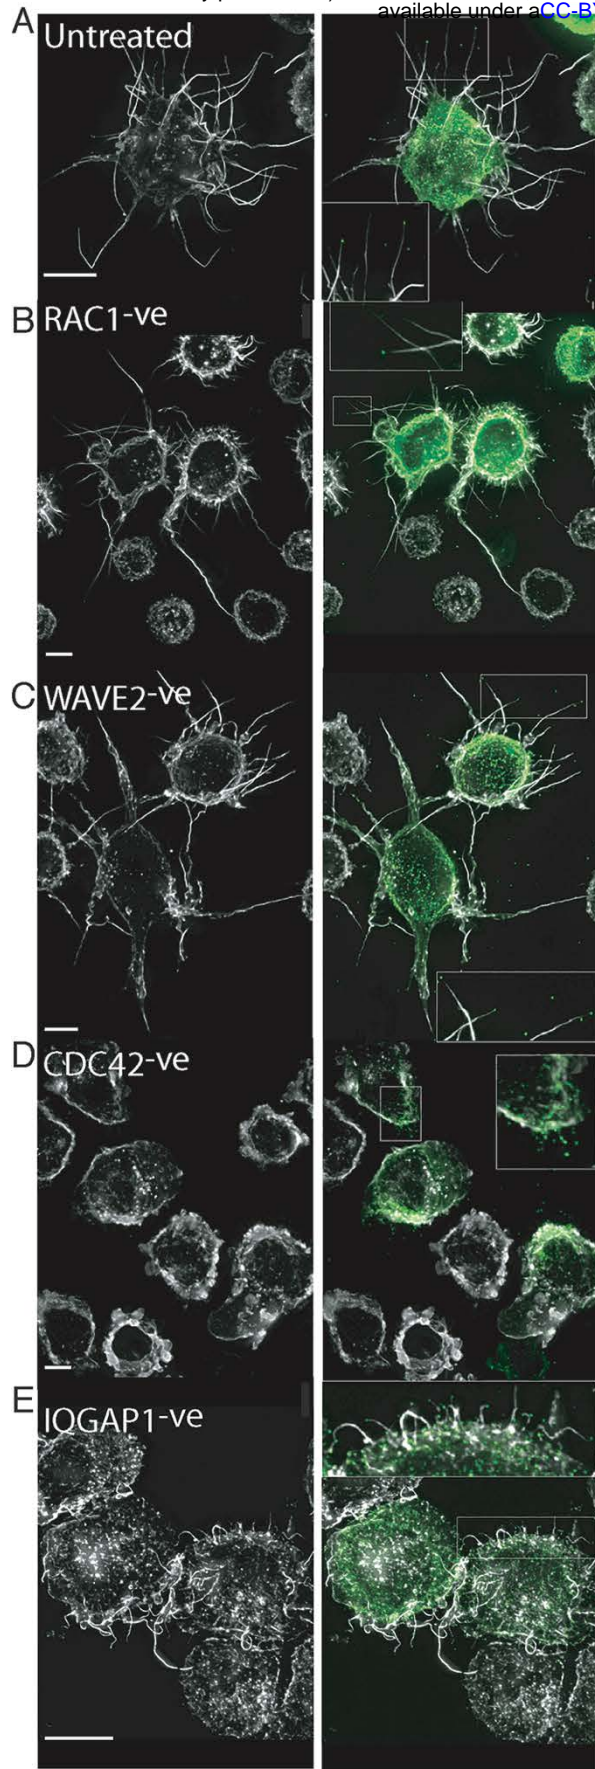

Figure 6.



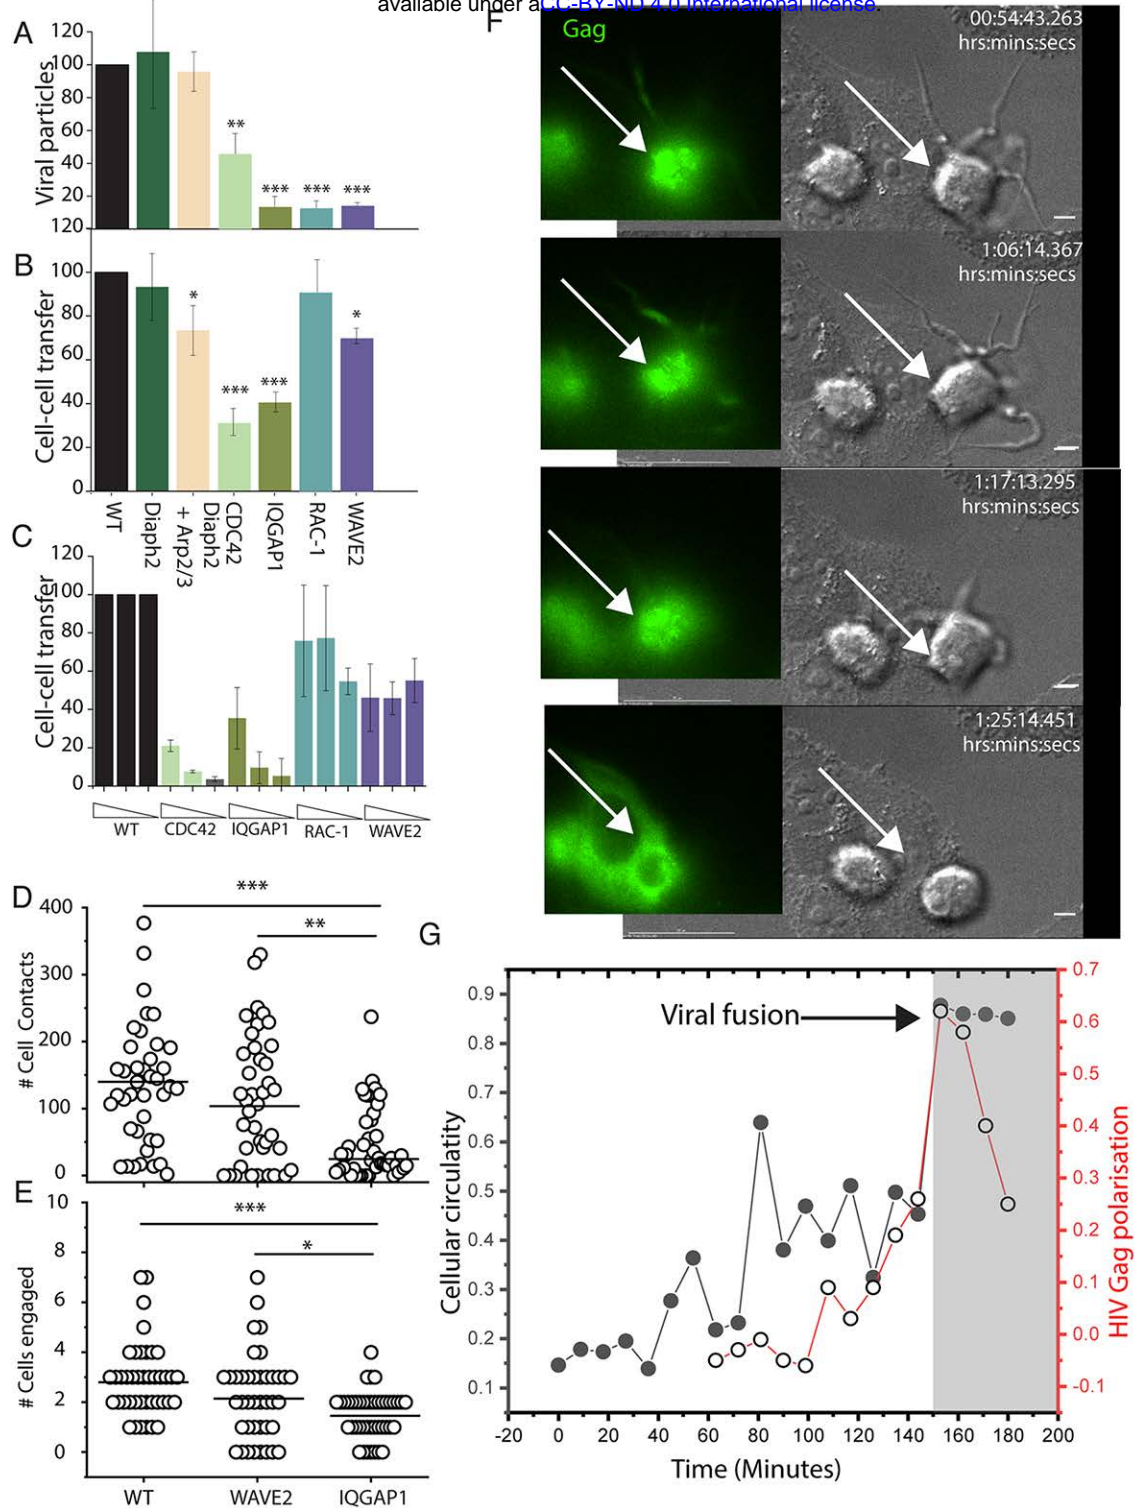

Figure 7.
